# Supplementary material for: Circulating microRNA Profiles Identify a Patient Subgroup with High Inflammation and Severe Symptoms in Schizophrenia Experiencing Acute Psychosis
Source: MDPI journal article supplement (doi:10.3390/ijms25084291), 2024-04-12
Supplement: s1 [file s1]

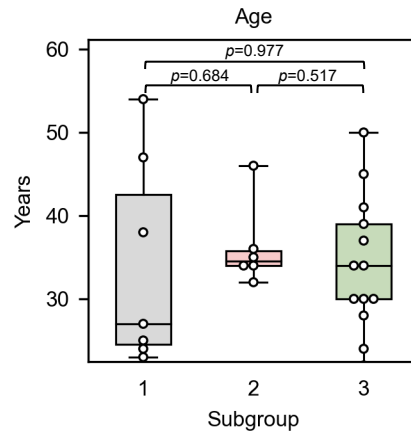

**Figure S1.** Patients' age was not different among the miRNA-based subgroups. Box-and-swarm plots show patients' age in each subgroup. Welch's *t*-test was applied to compare patients' age among the subgroups (nominal  $p > 0.05$ ).

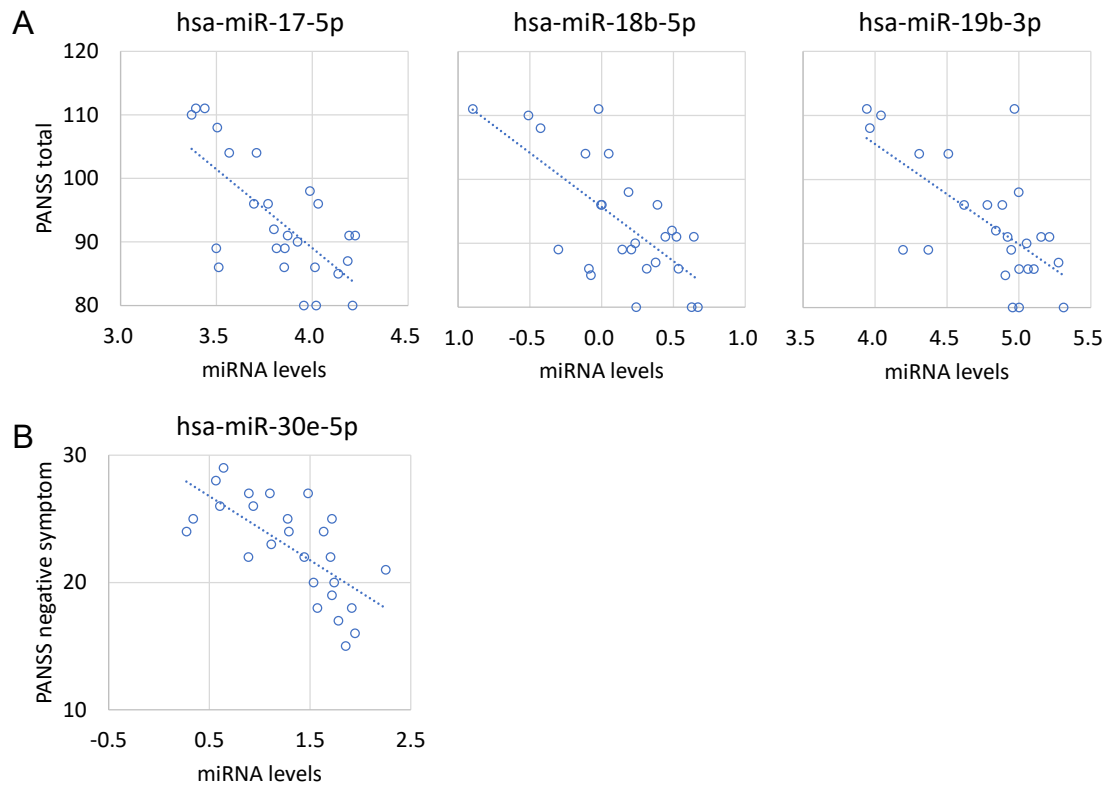

**Figure S2.** Individual miRNAs were inversely correlated with PANSS scores in the 26 schizophrenia patients. Scatter plots visualize the relationships between individual miRNAs and PANSS scores with significant Pearson's correlation coefficients (Benjamini-Hochberg corrected  $p < 0.05$ ). (A) correlations between hsa-miR-17-5p, hsa-miR-18b-5p, and hsa-miR-19b-3p with PANSS total scores. (B) a correlation between hsa-miR-30e-5p with PANSS negative symptom subscales.

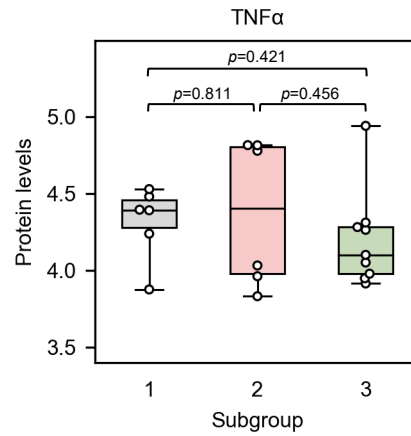

**Figure S3.** Protein levels of TNF $\alpha$  in plasma were not different among the miRNA-based subgroups. Box-and-swarm plots show expression levels of a TNF $\alpha$  protein in each subgroup. Welch's  $t$ -test was applied to compare TNF $\alpha$  protein levels among the subgroups (nominal  $p>0.05$ ).
