# Supplementary material for: Circulating microRNA Profiles Identify a Patient Subgroup with High Inflammation and Severe Symptoms in Schizophrenia Experiencing Acute Psychosis
Source: Int J Mol Sci. 2024 Apr 12;25(8):4291. doi: 10.3390/ijms25084291 (PMC11050142; doi:10.3390/ijms25084291)
Supplement: Supplementary file 1 [file ijms-25-04291-s001.zip]

Archive with 7 entries (7 files):
- Supplementary Figures.pdf
- Supplementary Table S1_Mean and SD values of miRNA levels.xlsx
- Supplementary Table S2_Correlation coefficients between individual miRNAs and PANSS scores.xlsx
- Supplementary Table S3_MicroRNA set enrichment results (without filtering).xlsx
- Supplementary Table S4_Mean and SD values of protein levels.xlsx
- Supplementary Table S5_Protein set enrichment results (without filtering).xlsx
- Supplementary Table S6_Correlation coefficients between individual proteins and PANSS scores.xlsx
