# Supplementary material for: Circulating microRNA Profiles Identify a Patient Subgroup with High Inflammation and Severe Symptoms in Schizophrenia Experiencing Acute Psychosis
Source: Int J Mol Sci. 2024 Apr 12;25(8):4291. doi: 10.3390/ijms25084291 (PMC11050142; doi:10.3390/ijms25084291)
Supplement: Supplementary file 1 [file ijms-25-04291-s001.zip › Supplementary Table S1_Mean and SD values of miRNA levels.xlsx]

## Sheet: all the 179 miRNAs
miRNA names	hsa-miR-19a-3p	hsa-miR-19b-3p	hsa-miR-18a-5p	hsa-miR-18b-5p	hsa-miR-301a-3p	hsa-miR-17-5p	hsa-let-7g-5p	hsa-miR-28-5p	hsa-miR-106b-3p	hsa-miR-140-5p	hsa-miR-30e-5p	hsa-miR-223-3p	hsa-miR-199a-5p	hsa-miR-186-5p	hsa-miR-30e-3p	hsa-miR-126-3p	hsa-miR-26a-5p	hsa-let-7d-5p	hsa-miR-26b-5p	hsa-miR-191-5p	hsa-miR-30b-5p	hsa-miR-374b-5p	hsa-miR-374a-5p	hsa-miR-93-3p	hsa-miR-145-5p	hsa-miR-143-3p	hsa-miR-200c-3p	hsa-miR-324-3p	hsa-miR-324-5p	hsa-miR-339-5p	hsa-miR-195-5p	hsa-miR-181a-5p	hsa-miR-1	hsa-miR-133b	hsa-miR-133a-3p	hsa-miR-421	hsa-miR-127-3p	hsa-miR-136-3p	hsa-miR-382-5p	hsa-miR-409-3p	hsa-miR-136-5p	hsa-miR-154-5p	hsa-miR-495-3p	hsa-miR-376a-3p	hsa-miR-376c-3p	hsa-miR-485-3p	hsa-miR-543	hsa-miR-99b-5p	hsa-miR-335-3p
mean values of miRNA levels in all the samples	5.12947	4.78139	0.957164	0.139471	-1.8663	3.82793	2.09216	-2.55399	-4.2863	-2.14437	1.31447	6.33909	0.882164	-1.21784	-1.87784	4.64178	3.00101	0.375625	2.14178	2.57293	1.5687	0.181779	0.662548	-3.45207	-0.172452	-0.234375	-5.29207	-1.27284	-3.33361	-1.86207	-3.52514	0.291779	-3.64053	-2.96937	-2.42899	-2.93168	-4.52668	-3.75014	-2.31284	-2.09476	-1.92437	-2.40899	-1.96168	1.02101	0.859087	-3.66822	-3.75322	-2.45284	-3.97284
mean values of miRNA levels within subgroup 1	5.35303	5.03732	1.26589	0.403033	-1.51125	3.88875	2.16018	-1.71697	-3.50268	-1.81125	1.76303	7.15875	1.72732	-0.718396	-1.38982	4.77875	3.27875	0.67589	2.2916	2.91018	1.87446	0.783033	0.944461	-3.02411	0.147318	0.461604	-4.87554	-1.06411	-2.73411	-1.41268	-3.52411	0.528747	-3.04411	-2.55125	-2.10411	-2.64268	-2.9284	-2.47411	-1.5984	-1.03125	-0.828396	-1.47554	-0.981253	1.93446	1.85446	-2.59411	-2.88697	-2.10268	-3.24697
mean values of miRNA levels within subgroup 2	4.59032	4.23032	0.445317	-0.193017	-2.31635	3.57698	1.72865	-3.45635	-4.04802	-2.48802	0.846983	5.56532	0.340317	-1.99635	-2.32968	4.46198	2.67698	0.0886499	1.67365	2.03032	1.12865	-0.63635	-0.00801676	-4.45635	-0.87135	-0.943017	-5.99968	-1.37468	-3.67968	-2.00468	-3.48968	0.291983	-4.01968	-2.81802	-2.62135	-2.87968	-5.14635	-3.35635	-1.37302	-1.79802	-1.58302	-1.36135	-1.46635	1.88698	1.75365	-3.36302	-2.84302	-2.24968	-3.79135
mean values of miRNA levels within subgroup 3	5.25793	4.89793	1.02716	0.15101	-1.84976	3.91101	2.22332	-2.58822	-4.81822	-2.16514	1.2887	6.25486	0.677164	-1.12745	-1.93207	4.65101	3.00101	0.346394	2.27716	2.64178	1.60716	0.235625	0.820241	-3.21899	-0.022067	-0.282067	-5.18976	-1.33822	-3.49668	-2.03822	-3.54207	0.164087	-3.78668	-3.26437	-2.51514	-3.1113	-5.1013	-4.61899	-3.1313	-2.80437	-2.67207	-3.39514	-2.71822	0.129471	-0.0897593	-4.38745	-4.63976	-2.73514	-4.44745
SD values of miRNA levels in all the samples	0.394571	0.40761	0.454702	0.385183	0.548547	0.26786	0.328217	1.02916	1.40573	0.51313	0.536794	0.733238	0.837304	0.549966	0.459992	0.247528	0.423651	0.354125	0.387092	0.464397	0.43408	0.656218	0.549987	0.855087	0.79081	1.02668	1.24562	0.267578	0.678815	0.696016	0.511616	0.433025	1.02091	1.00981	0.989196	0.459429	1.73922	1.39567	1.10038	1.26518	1.1338	1.49218	1.08002	1.16213	1.22862	1.15651	1.26411	0.730496	0.967221
SD values of miRNA levels within subgroup 1	0.17923	0.16878	0.309115	0.250492	0.329694	0.260792	0.296953	0.379728	0.280906	0.15437	0.256884	0.302112	0.399852	0.2432	0.347562	0.223676	0.419729	0.316324	0.310697	0.510723	0.435081	0.304613	0.39217	0.829722	0.97864	1.18853	0.518626	0.166051	0.361013	0.628426	0.450227	0.525934	1.36361	1.32327	1.35458	0.309501	0.839181	0.956983	0.993395	0.873691	0.97416	1.19216	0.851656	0.89411	0.91098	0.719318	0.928998	0.294216	0.493731
SD values of miRNA levels within subgroup 2	0.162429	0.205528	0.311767	0.262511	0.550426	0.159821	0.157248	0.628995	0.289492	0.327378	0.29754	0.312574	0.618104	0.184474	0.268886	0.186294	0.512907	0.337784	0.375177	0.294179	0.471481	0.585625	0.621701	0.796018	0.718656	0.695915	2.04176	0.387225	0.567887	0.766721	0.436855	0.366931	0.482631	1.06312	1.26279	0.426465	1.98985	1.36358	0.705796	0.834425	0.635896	0.932924	0.59665	0.694708	0.752545	0.622026	0.735081	0.565475	1.05006
SD values of miRNA levels within subgroup 3	0.323906	0.330953	0.388023	0.391241	0.520763	0.252401	0.287458	1.07358	1.83012	0.606407	0.550511	0.578602	0.782597	0.359137	0.32573	0.246923	0.280576	0.262664	0.250458	0.253236	0.228742	0.398934	0.306766	0.495035	0.529564	0.867046	0.999029	0.194082	0.679777	0.636596	0.602913	0.381869	0.917647	0.755147	0.607099	0.480667	1.50338	0.990121	0.597101	1.18896	0.818891	1.20619	0.784635	0.700065	0.735185	1.04239	0.984407	0.869889	0.894331
[truncated: 130 more columns]
