# Supplementary material for: Circulating microRNA Profiles Identify a Patient Subgroup with High Inflammation and Severe Symptoms in Schizophrenia Experiencing Acute Psychosis
Source: Int J Mol Sci. 2024 Apr 12;25(8):4291. doi: 10.3390/ijms25084291 (PMC11050142; doi:10.3390/ijms25084291)
Supplement: Supplementary file 1 [file ijms-25-04291-s001.zip › Supplementary Table S2_Correlation coefficients between individual miRNAs and PANSS scores.xlsx]

## Sheet: PANSS_total
miRNAs names	Pearson's correlation coefficients	p values	Benjamini–Hochberg corrected p values
hsa-miR-17-5p	-0.695403	8.02884e-05	0.0142694
hsa-miR-18b-5p	-0.684027	0.000116641	0.0205492
hsa-miR-19b-3p	-0.668757	0.000187831	0.0327026
hsa-miR-19a-3p	-0.64566	0.000367656	0.0626695
hsa-miR-18a-5p	-0.620105	0.000727149	0.119528
hsa-miR-26b-5p	-0.587962	0.00158409	0.241073
hsa-miR-30e-5p	-0.587484	0.00160158	0.24217
hsa-miR-374b-5p	-0.555278	0.00323328	0.427089
hsa-let-7g-5p	-0.542676	0.00417811	0.511274
hsa-miR-324-5p	-0.532515	0.00510146	0.580826
hsa-miR-93-3p	-0.514939	0.00710566	0.700351
hsa-miR-301a-3p	-0.513272	0.00732608	0.709256
hsa-miR-374a-5p	-0.502257	0.00893103	0.776464
hsa-miR-223-3p	-0.497971	0.00963018	0.799383
hsa-miR-30b-5p	-0.497047	0.00978677	0.802649
hsa-miR-199a-5p	-0.481499	0.0127561	0.87821
hsa-miR-26a-5p	-0.480976	0.0128676	0.878887
hsa-miR-191-5p	-0.480155	0.0130445	0.880819
hsa-miR-106a-5p	-0.47736	0.0136614	0.890808
hsa-let-7d-5p	-0.471111	0.0151281	0.912751
hsa-miR-1260a	0.467098	0.0161366	0.924728
hsa-miR-382-5p	0.460822	0.0178243	0.94167
hsa-miR-154-5p	0.451938	0.020458	0.96104
hsa-miR-148a-3p	0.448569	0.0215362	0.966505
hsa-miR-375	0.442727	0.0235155	0.974989
hsa-miR-136-3p	0.432982	0.0271437	0.985562
hsa-miR-16-5p	-0.430995	0.0279361	0.986899
hsa-miR-143-3p	-0.430883	0.0279814	0.986899
hsa-miR-24-3p	-0.430429	0.0281651	0.986899
hsa-miR-324-3p	-0.426185	0.0299318	0.989521
hsa-miR-423-5p	0.421032	0.0321956	0.992373
hsa-miR-2110	0.416241	0.0344216	0.994395
hsa-miR-362-3p	0.413074	0.0359593	0.995408
hsa-miR-186-5p	-0.405553	0.0398307	0.997353
hsa-miR-200c-3p	-0.401066	0.0422938	0.9981
hsa-miR-365a-3p	0.399545	0.043155	0.998257
hsa-miR-423-3p	-0.395177	0.045707	0.998757
hsa-miR-376a-3p	0.392158	0.0475392	0.999009
hsa-miR-126-3p	-0.382265	0.0539504	0.999598
hsa-miR-146b-5p	-0.375571	0.0586588	0.999789
hsa-miR-7-1-3p	-0.367512	0.0647431	0.999909
hsa-miR-145-5p	-0.366847	0.065266	0.99991
hsa-miR-28-5p	-0.366128	0.065835	0.999911
hsa-miR-100-5p	0.353813	0.0761893	0.999979
hsa-miR-93-5p	-0.352415	0.0774387	0.999981
hsa-miR-151a-5p	-0.350836	0.0788688	0.999983
hsa-miR-30d-5p	-0.344586	0.0847283	0.999992
hsa-miR-30e-3p	-0.344121	0.0851775	0.999992
hsa-miR-103a-3p	-0.342271	0.0869798	0.999993
hsa-miR-130b-3p	0.340415	0.088818	0.999994
hsa-miR-99a-5p	0.338606	0.0906377	0.999995
hsa-miR-339-5p	-0.331148	0.098435	0.999998
hsa-miR-151a-3p	-0.329104	0.100657	0.999999
hsa-miR-140-5p	-0.32823	0.101618	0.999999
hsa-miR-376c-3p	0.326169	0.103913	0.999999
hsa-miR-21-5p	0.326075	0.104019	0.999999
hsa-miR-223-5p	-0.322087	0.10857	0.999999
hsa-miR-1	-0.320064	0.110934	0.999999
hsa-miR-320a	0.314904	0.117138	1
hsa-miR-320d	0.307502	0.126476	1
hsa-miR-32-5p	0.300293	0.136081	1
hsa-miR-136-5p	0.29829	0.138842	1
hsa-miR-502-3p	0.293454	0.145671	1
hsa-miR-10b-5p	0.286535	0.155855	1
hsa-miR-495-3p	0.283725	0.160132	1
hsa-miR-409-3p	0.283523	0.160442	1
hsa-miR-208a-3p	0.280866	0.164568	1
hsa-miR-194-5p	0.276315	0.171807	1
hsa-miR-101-3p	0.275539	0.173063	1
hsa-miR-421	-0.27302	0.177185	1
hsa-miR-335-5p	0.27219	0.178559	1
hsa-miR-497-5p	0.27054	0.18131	1
hsa-miR-222-3p	0.269768	0.182608	1
hsa-miR-152-3p	0.268772	0.184291	1
hsa-miR-484	0.267223	0.186931	1
mmu-miR-378a-3p	0.263962	0.192572	1
hsa-miR-331-3p	-0.263491	0.193397	1
hsa-miR-92a-3p	0.263278	0.193771	1
hsa-miR-106b-5p	-0.262163	0.195734	1
hsa-miR-126-5p	-0.258885	0.201587	1
hsa-miR-320b	0.258645	0.20202	1
hsa-miR-23b-3p	-0.258291	0.202661	1
hsa-miR-148b-3p	0.244044	0.229575	1
hsa-miR-454-3p	-0.242574	0.23248	1
hsa-miR-210-3p	-0.23942	0.238798	1
hsa-let-7d-3p	0.239217	0.239208	1
hsa-miR-199a-3p	-0.235829	0.246128	1
hsa-miR-125a-5p	-0.235102	0.24763	1
hsa-miR-320c	0.233766	0.250405	1
hsa-miR-766-3p	-0.222135	0.275422	1
hsa-miR-125b-5p	0.216951	0.287068	1
hsa-miR-27b-3p	-0.214834	0.291912	1
hsa-miR-142-5p	-0.213615	0.294724	1
hsa-miR-107	-0.207137	0.309954	1
hsa-miR-652-3p	-0.205979	0.312728	1
hsa-miR-27a-3p	-0.205216	0.314564	1
hsa-miR-221-3p	-0.20431	0.316751	1
hsa-miR-451a	-0.200759	0.325415	1
hsa-miR-106b-3p	-0.197786	0.33278	1
hsa-miR-486-5p	0.197011	0.334717	1
hsa-miR-185-5p	-0.196653	0.335614	1
hsa-miR-7-5p	-0.195182	0.339313	1
hsa-miR-483-5p	0.193526	0.343506	1
hsa-miR-139-5p	-0.193296	0.344092	1
hsa-miR-342-3p	-0.192923	0.345043	1
hsa-miR-33a-5p	-0.190214	0.351989	1
hsa-miR-660-5p	0.189103	0.35486	1
hsa-miR-23a-3p	-0.187915	0.357946	1
hsa-miR-15b-5p	-0.185023	0.365526	1
hsa-miR-874-3p	0.183151	0.370484	1
hsa-miR-20a-5p	-0.181177	0.375751	1
hsa-miR-584-5p	0.179148	0.381211	1
hsa-miR-195-5p	0.177891	0.384616	1
hsa-miR-200a-3p	0.177707	0.385115	1
hsa-miR-543	0.176673	0.387932	1
hsa-miR-425-5p	0.17439	0.39419	1
hsa-miR-629-5p	0.172732	0.398771	1
hsa-miR-425-3p	-0.17181	0.401333	1
hsa-miR-28-3p	-0.169936	0.406565	1
hsa-miR-192-5p	0.168178	0.411509	1
hsa-miR-590-5p	0.167467	0.413518	1
hsa-miR-15b-3p	-0.166443	0.416421	1
hsa-miR-532-5p	-0.164142	0.422984	1
hsa-miR-34a-5p	-0.161172	0.431536	1
hsa-miR-30a-5p	0.15332	0.454599	1
hsa-miR-146a-5p	-0.152207	0.457919	1
hsa-let-7c-5p	-0.151239	0.460818	1
hsa-miR-501-3p	-0.150932	0.461739	1
hsa-miR-15a-5p	0.14865	0.468615	1
hsa-miR-142-3p	0.145465	0.478302	1
hsa-miR-155-5p	0.142215	0.488292	1
hsa-miR-20b-5p	-0.141819	0.489516	1
hsa-miR-144-5p	0.141388	0.490851	1
hsa-miR-338-3p	-0.13872	0.49915	1
hsa-let-7f-5p	-0.130143	0.526296	1
hsa-miR-885-5p	0.12398	0.546228	1
hsa-miR-30c-5p	-0.121923	0.552958	1
hsa-miR-132-3p	0.121123	0.555584	1
hsa-miR-29b-3p	0.119965	0.5594	1
hsa-miR-505-3p	-0.115951	0.572709	1
hsa-miR-92b-3p	0.112545	0.58411	1
hsa-miR-193a-5p	0.109879	0.593106	1
hsa-miR-424-5p	0.1075	0.601181	1
hsa-miR-485-3p	0.107013	0.602838	1
hsa-miR-22-3p	-0.106262	0.605399	1
hsa-miR-130a-3p	0.106084	0.606008	1
hsa-miR-29a-3p	0.0933333	0.650193	1
hsa-miR-215-5p	0.0905408	0.660032	1
hsa-miR-574-3p	-0.0904759	0.660261	1
hsa-miR-339-3p	0.0901591	0.661381	1
hsa-let-7a-5p	-0.0879496	0.669211	1
hsa-miR-133a-3p	0.0841714	0.682679	1
hsa-miR-150-5p	0.0824856	0.688719	1
hsa-let-7b-3p	0.0814721	0.692359	1
hsa-miR-99b-5p	0.0802513	0.696753	1
hsa-let-7e-5p	-0.0780081	0.704851	1
hsa-miR-127-3p	-0.0726264	0.724406	1
hsa-miR-326	0.0701872	0.733325	1
hsa-miR-29c-3p	0.0695145	0.735791	1
hsa-miR-877-5p	0.0695055	0.735824	1
hsa-let-7i-5p	0.0682678	0.740368	1
hsa-miR-140-3p	-0.0647014	0.753508	1
hsa-miR-363-3p	0.0610818	0.766912	1
hsa-miR-133b	-0.0570187	0.782037	1
hsa-miR-205-5p	0.0546855	0.790757	1
hsa-miR-144-3p	0.0409103	0.842712	1
hsa-miR-16-2-3p	0.0385936	0.851519	1
hsa-miR-22-5p	0.0332219	0.872005	1
hsa-miR-128-3p	-0.030368	0.882923	1
hsa-miR-335-3p	0.0295436	0.88608	1
hsa-let-7b-5p	0.0255083	0.901561	1
hsa-miR-532-3p	0.0254181	0.901907	1
hsa-miR-122-5p	0.0212691	0.91786	1
hsa-miR-197-3p	0.0207748	0.919763	1
hsa-miR-328-3p	0.0116341	0.955018	1
hsa-miR-141-3p	0.0113627	0.956066	1
hsa-miR-181a-5p	0.00785496	0.969621	1
hsa-miR-361-5p	-0.00717535	0.972249	1
hsa-miR-25-3p	0.00493008	0.980931	1

## Sheet: PANSS_positive symptom
miRNAs names	Pearson's correlation coefficients	p values	Benjamini–Hochberg corrected p values
hsa-miR-409-3p	0.421146	0.0321442	0.997115
hsa-miR-18b-5p	-0.412022	0.0364818	0.99866
hsa-miR-154-5p	0.411663	0.0366615	0.99866
hsa-miR-17-5p	-0.4017	0.0419385	0.999469
hsa-miR-18b-5p	-0.397724	0.0442053	0.999634
hsa-miR-382-5p	0.393933	0.0464551	0.999746
hsa-miR-505-3p	-0.381387	0.0545505	0.999939
hsa-miR-34a-5p	-0.375611	0.0586297	0.999969
hsa-miR-19b-3p	-0.346886	0.0825347	1
hsa-miR-19a-3p	-0.341731	0.0875123	1
hsa-miR-106b-5p	-0.336093	0.0932104	1
hsa-miR-200c-3p	-0.33121	0.0983675	1
hsa-miR-7-5p	-0.330226	0.099433	1
hsa-miR-2110	0.324958	0.105279	1
hsa-miR-16-5p	-0.316493	0.115201	1
hsa-miR-136-3p	0.313409	0.118982	1
hsa-miR-376a-3p	0.304587	0.130299	1
hsa-let-7g-5p	-0.299339	0.137391	1
hsa-miR-93-5p	-0.295191	0.14319	1
hsa-miR-99b-5p	0.291673	0.148245	1
hsa-miR-22-5p	0.290262	0.150308	1
hsa-miR-376c-3p	0.27971	0.166386	1
hsa-miR-26b-5p	-0.275444	0.173217	1
hsa-miR-324-5p	-0.274669	0.17448	1
hsa-miR-1	-0.2565	0.205919	1
hsa-miR-584-5p	0.254949	0.208771	1
hsa-miR-424-5p	-0.252859	0.212655	1
hsa-miR-18a-5p	-0.252737	0.212883	1
hsa-miR-130b-3p	0.251504	0.2152	1
hsa-miR-451a	-0.249068	0.219826	1
hsa-miR-197-3p	0.248874	0.220196	1
hsa-miR-20a-5p	-0.245603	0.226518	1
hsa-miR-495-3p	0.24287	0.231894	1
hsa-miR-335-5p	0.242542	0.232544	1
hsa-miR-143-3p	-0.239675	0.238283	1
hsa-miR-423-5p	0.23951	0.238616	1
hsa-miR-122-5p	-0.235776	0.246237	1
hsa-miR-485-3p	0.234999	0.247842	1
hsa-miR-215-5p	-0.231719	0.254695	1
hsa-miR-301a-3p	-0.225865	0.267231	1
hsa-miR-145-5p	-0.224456	0.270306	1
hsa-miR-324-3p	-0.223274	0.272904	1
hsa-miR-146b-5p	-0.222071	0.275564	1
hsa-miR-185-5p	-0.21877	0.282946	1
hsa-let-7d-3p	0.218587	0.28336	1
hsa-miR-7-1-3p	-0.216907	0.287168	1
hsa-miR-590-5p	0.215473	0.290446	1
hsa-miR-132-3p	0.212846	0.296508	1
hsa-miR-106b-3p	0.209992	0.303184	1
hsa-miR-877-5p	0.207719	0.308567	1
hsa-miR-210-3p	-0.206946	0.310412	1
hsa-miR-136-5p	0.206343	0.311854	1
hsa-miR-874-3p	-0.205606	0.313624	1
hsa-miR-25-3p	-0.203128	0.319621	1
hsa-miR-152-3p	0.202612	0.320877	1
hsa-miR-146a-5p	0.199973	0.327354	1
hsa-miR-339-3p	0.198426	0.331187	1
hsa-miR-21-5p	0.198003	0.332239	1
hsa-miR-532-3p	-0.193302	0.344078	1
hsa-let-7b-5p	-0.189534	0.353744	1
hsa-miR-140-3p	-0.188887	0.355419	1
hsa-miR-15b-3p	-0.183886	0.368533	1
hsa-miR-543	0.182101	0.373279	1
hsa-miR-16-2-3p	-0.179355	0.380651	1
hsa-miR-221-3p	0.17919	0.381098	1
hsa-miR-20b-5p	-0.178803	0.382143	1
hsa-miR-362-3p	0.175149	0.392103	1
hsa-miR-192-5p	-0.165985	0.417722	1
hsa-miR-374a-5p	-0.156374	0.445554	1
hsa-miR-326	0.15201	0.458507	1
hsa-miR-30a-5p	-0.147908	0.470862	1
hsa-miR-766-3p	0.147803	0.471183	1
hsa-miR-205-5p	-0.147723	0.471424	1
hsa-miR-365a-3p	0.14761	0.471769	1
hsa-miR-363-3p	-0.145414	0.478459	1
hsa-miR-885-5p	-0.142564	0.487214	1
hsa-miR-222-3p	0.13897	0.49837	1
hsa-miR-33a-5p	0.137028	0.504451	1
hsa-miR-629-5p	0.136584	0.505844	1
hsa-miR-128-3p	0.134563	0.512219	1
hsa-miR-148b-3p	0.13443	0.51264	1
hsa-miR-22-3p	0.132973	0.517262	1
hsa-miR-1260a	0.132919	0.517434	1
hsa-miR-425-3p	0.131115	0.523186	1
hsa-miR-502-3p	0.130156	0.526255	1
hsa-miR-320a	0.128777	0.530686	1
hsa-miR-200a-3p	-0.127729	0.534063	1
hsa-miR-328-3p	0.125342	0.541794	1
hsa-miR-342-3p	-0.123871	0.546583	1
mmu-miR-378a-3p	-0.122745	0.550265	1
hsa-miR-660-5p	-0.122258	0.551859	1
hsa-miR-483-5p	0.121637	0.553897	1
hsa-miR-130a-3p	0.118432	0.564467	1
hsa-miR-339-5p	-0.117807	0.566536	1
hsa-miR-93-3p	-0.116202	0.571873	1
hsa-miR-126-5p	0.112863	0.583041	1
hsa-miR-142-5p	0.111288	0.588345	1
hsa-miR-191-5p	-0.110746	0.590175	1
hsa-miR-142-3p	0.107343	0.601714	1
hsa-miR-133b	-0.106781	0.603629	1
hsa-miR-103a-3p	-0.105228	0.608933	1
hsa-miR-144-3p	-0.104364	0.611893	1
hsa-miR-421	-0.101492	0.621777	1
hsa-miR-194-5p	-0.101031	0.623368	1
hsa-miR-99a-5p	-0.100449	0.62538	1
hsa-miR-151a-3p	-0.0972124	0.636619	1
hsa-miR-335-3p	0.096856	0.637861	1
hsa-miR-374b-5p	-0.0962416	0.640006	1
hsa-miR-320d	0.0955818	0.642311	1
hsa-miR-92b-3p	0.0936827	0.648966	1
hsa-let-7e-5p	-0.0920943	0.654551	1
hsa-miR-26a-5p	-0.0897554	0.662809	1
hsa-miR-125b-5p	-0.0895993	0.663362	1
hsa-miR-15a-5p	-0.0895961	0.663373	1
hsa-miR-125a-5p	-0.0889049	0.665822	1
hsa-miR-454-3p	-0.0886492	0.666728	1
hsa-miR-30b-5p	-0.0885837	0.666961	1
hsa-miR-30c-5p	-0.0827609	0.687731	1
hsa-miR-92a-3p	-0.0816513	0.691715	1
hsa-miR-27b-3p	0.0802616	0.696716	1
hsa-let-7c-5p	0.0798026	0.69837	1
hsa-miR-199a-3p	0.0751912	0.715065	1
hsa-miR-361-5p	0.0746652	0.716977	1
hsa-miR-186-5p	-0.0743457	0.71814	1
hsa-miR-532-5p	-0.0739097	0.719727	1
hsa-miR-144-5p	-0.0727699	0.723882	1
hsa-miR-652-3p	0.0722428	0.725806	1
hsa-miR-27a-3p	0.0706741	0.731542	1
hsa-miR-28-5p	0.0653622	0.751068	1
hsa-miR-484	0.0652711	0.751404	1
hsa-miR-126-3p	0.0651923	0.751695	1
hsa-miR-486-5p	-0.0608951	0.767605	1
hsa-miR-501-3p	-0.0569217	0.782399	1
hsa-miR-30e-3p	0.0563066	0.784696	1
hsa-miR-208a-3p	-0.0554119	0.78804	1
hsa-miR-141-3p	0.0548139	0.790277	1
hsa-let-7f-5p	-0.0533501	0.79576	1
hsa-miR-223-3p	-0.0521192	0.800378	1
hsa-miR-155-5p	0.0517851	0.801632	1
hsa-miR-338-3p	0.051767	0.8017	1
hsa-miR-139-5p	0.0483099	0.814709	1
hsa-miR-23a-3p	0.0478332	0.816507	1
hsa-let-7i-5p	0.0466091	0.821128	1
hsa-miR-127-3p	0.0465689	0.821279	1
hsa-miR-331-3p	0.0452671	0.8262	1
hsa-miR-151a-5p	0.0435923	0.832539	1
hsa-miR-320b	0.0418083	0.839303	1
hsa-miR-423-3p	0.0415934	0.840118	1
hsa-miR-24-3p	0.0367348	0.858598	1
hsa-miR-29c-3p	-0.0362782	0.860338	1
hsa-miR-150-5p	-0.0331673	0.872214	1
hsa-miR-425-5p	-0.0296117	0.885819	1
hsa-miR-107	-0.0291988	0.887402	1
hsa-miR-181a-5p	0.0287861	0.888984	1
hsa-miR-195-5p	-0.0281876	0.891278	1
hsa-miR-30d-5p	0.0254008	0.901974	1
hsa-miR-32-5p	0.0244393	0.905667	1
hsa-miR-100-5p	0.023882	0.907809	1
hsa-miR-29a-3p	0.0236288	0.908783	1
hsa-miR-497-5p	-0.0220687	0.914783	1
hsa-let-7a-5p	-0.0220558	0.914833	1
hsa-miR-10b-5p	0.0214142	0.917302	1
hsa-miR-28-3p	0.021301	0.917738	1
hsa-let-7b-3p	-0.0212208	0.918046	1
hsa-miR-148a-3p	0.0186906	0.927791	1
hsa-miR-320c	0.0183228	0.929209	1
hsa-miR-140-5p	0.0180737	0.930169	1
hsa-miR-574-3p	-0.0161133	0.937728	1
hsa-miR-133a-3p	0.0144302	0.944222	1
hsa-miR-199a-5p	0.013866	0.946399	1
hsa-miR-375	0.0132856	0.94864	1
hsa-miR-223-5p	-0.0129436	0.949961	1
hsa-miR-29b-3p	-0.0111076	0.957052	1
hsa-miR-15b-5p	0.00968843	0.962535	1
hsa-miR-193a-5p	-0.00893333	0.965453	1
hsa-let-7d-5p	-0.0063188	0.97556	1
hsa-miR-101-3p	-0.00393231	0.984789	1
hsa-miR-23b-3p	-0.00356521	0.986209	1
hsa-miR-30e-5p	5.51367e-05	0.999787	1

## Sheet: PANSS_negative symptom
miRNAs names	Pearson's correlation coefficients	p values	Benjamini–Hochberg corrected p values
hsa-miR-30e-5p	-0.692847	8.74432e-05	0.0155311
hsa-miR-18b-5p	-0.640091	0.000428778	0.0734979
hsa-let-7d-5p	-0.635417	0.000486743	0.0825659
hsa-miR-93-3p	-0.633069	0.000518357	0.0872147
hsa-miR-374b-5p	-0.624821	0.000644023	0.106617
hsa-miR-223-3p	-0.569851	0.00237354	0.33866
hsa-miR-191-5p	-0.567468	0.00249902	0.351357
hsa-miR-99a-5p	0.562785	0.00276216	0.37858
hsa-miR-30b-5p	-0.553269	0.00337036	0.438591
hsa-miR-148a-3p	0.548779	0.0036948	0.467024
hsa-miR-18a-5p	-0.545162	0.00397509	0.48989
hsa-miR-374a-5p	-0.53036	0.005318	0.591722
hsa-miR-186-5p	-0.518864	0.00660873	0.669557
hsa-miR-19a-3p	-0.516405	0.00691645	0.684033
hsa-miR-26b-5p	-0.511041	0.00762993	0.717412
hsa-miR-19b-3p	-0.510077	0.00776451	0.721503
hsa-miR-24-3p	-0.510011	0.00777374	0.721503
hsa-miR-26a-5p	-0.49738	0.00972998	0.794842
hsa-miR-17-5p	-0.492879	0.0105196	0.817795
hsa-miR-375	0.488761	0.0112877	0.837375
hsa-miR-301a-3p	-0.482546	0.0125352	0.865432
hsa-miR-423-3p	-0.482094	0.0126301	0.865779
hsa-miR-28-5p	-0.479361	0.0132173	0.876183
hsa-miR-874-3p	0.478879	0.0133232	0.876607
hsa-miR-194-5p	0.473057	0.014658	0.898613
hsa-miR-30e-3p	-0.470824	0.0151985	0.905441
hsa-miR-1260a	0.470388	0.015306	0.905572
hsa-miR-126-3p	-0.467389	0.0160619	0.91467
hsa-miR-18b-5p	-0.457564	0.018756	0.942677
hsa-miR-331-3p	-0.447833	0.0217781	0.96322
mmu-miR-378a-3p	0.439964	0.0245015	0.975182
hsa-miR-208a-3p	0.419744	0.0327825	0.992796
hsa-let-7g-5p	-0.419638	0.0328309	0.992796
hsa-miR-766-3p	-0.419041	0.0331061	0.992796
hsa-miR-145-5p	-0.408445	0.0383048	0.996529
hsa-miR-92a-3p	0.395634	0.0454345	0.998764
hsa-miR-424-5p	0.394906	0.0458693	0.998787
hsa-miR-140-5p	-0.393704	0.0465941	0.998859
hsa-miR-221-3p	-0.38583	0.0515668	0.999427
hsa-miR-205-5p	0.382725	0.0536386	0.999555
hsa-miR-151a-5p	-0.376604	0.0579118	0.99975
hsa-miR-30d-5p	-0.376407	0.058054	0.99975
hsa-miR-142-5p	-0.371115	0.0619654	0.999844
hsa-miR-660-5p	0.369109	0.0635001	0.999867
hsa-miR-30a-5p	0.368818	0.0637251	0.999867
hsa-miR-200a-3p	0.368042	0.0643285	0.999867
hsa-miR-106b-3p	-0.365544	0.0662997	0.999891
hsa-miR-32-5p	0.36326	0.068143	0.99991
hsa-miR-425-3p	-0.360281	0.0706067	0.999932
hsa-miR-885-5p	0.359381	0.0713642	0.999934
hsa-miR-320d	0.354505	0.0755765	0.99996
hsa-miR-192-5p	0.35076	0.0789383	0.999973
hsa-miR-33a-5p	-0.350485	0.0791896	0.999973
hsa-miR-320b	0.349825	0.0797954	0.999973
hsa-miR-365a-3p	0.349469	0.0801237	0.999973
hsa-miR-10b-5p	0.345956	0.0834165	0.99998
hsa-miR-101-3p	0.345906	0.0834644	0.99998
hsa-miR-497-5p	0.345416	0.083932	0.99998
hsa-miR-125b-5p	0.343688	0.0855964	0.99998
hsa-miR-223-5p	-0.343195	0.086076	0.99998
hsa-miR-126-5p	-0.336023	0.0932836	0.999991
hsa-miR-652-3p	-0.33424	0.0951439	0.999992
hsa-miR-143-3p	-0.334162	0.0952255	0.999992
hsa-miR-107	-0.33048	0.0991575	0.999995
hsa-miR-215-5p	0.329196	0.100556	0.999995
hsa-miR-502-3p	0.326823	0.10318	0.999996
hsa-miR-199a-3p	-0.325623	0.104527	0.999996
hsa-miR-425-5p	0.323877	0.106509	0.999997
hsa-miR-103a-3p	-0.320891	0.109963	0.999998
hsa-miR-320c	0.31812	0.113242	0.999998
hsa-miR-146a-5p	-0.314786	0.117283	0.999999
hsa-miR-100-5p	0.31238	0.120264	0.999999
hsa-miR-423-5p	0.304227	0.130777	1
hsa-miR-320a	0.302159	0.133546	1
hsa-miR-339-5p	-0.298979	0.137888	1
hsa-miR-15a-5p	0.296759	0.140979	1
hsa-miR-222-3p	0.29365	0.145389	1
hsa-miR-324-5p	-0.29071	0.149651	1
hsa-miR-362-3p	0.290702	0.149662	1
hsa-miR-122-5p	0.290002	0.15069	1
hsa-miR-27b-3p	-0.284223	0.159368	1
hsa-miR-23a-3p	-0.283896	0.159869	1
hsa-miR-454-3p	-0.278862	0.167728	1
hsa-miR-22-5p	-0.277836	0.169364	1
hsa-miR-27a-3p	-0.273884	0.175764	1
hsa-miR-486-5p	0.272464	0.178105	1
hsa-miR-144-5p	0.268512	0.184733	1
hsa-miR-106a-5p	-0.265235	0.190357	1
hsa-miR-23b-3p	-0.262927	0.194387	1
hsa-miR-15b-5p	-0.256195	0.206479	1
hsa-miR-148b-3p	0.24958	0.218849	1
hsa-miR-128-3p	-0.24661	0.224561	1
hsa-miR-363-3p	0.238584	0.240491	1
hsa-miR-151a-3p	-0.238447	0.240769	1
hsa-miR-16-5p	-0.237298	0.243111	1
hsa-miR-22-3p	-0.235943	0.245892	1
hsa-miR-338-3p	-0.235887	0.246008	1
hsa-miR-324-3p	-0.233511	0.250937	1
hsa-miR-146b-5p	-0.232954	0.252101	1
hsa-miR-484	0.230631	0.256996	1
hsa-miR-130b-3p	0.226501	0.26585	1
hsa-miR-7-1-3p	-0.222128	0.275437	1
hsa-miR-127-3p	-0.221155	0.2776	1
hsa-miR-139-5p	-0.219931	0.280335	1
hsa-miR-382-5p	0.216759	0.287506	1
hsa-let-7c-5p	-0.214831	0.291918	1
hsa-miR-505-3p	0.210664	0.301604	1
hsa-miR-93-5p	-0.205006	0.315068	1
hsa-miR-150-5p	0.202067	0.322207	1
hsa-miR-483-5p	0.197503	0.333488	1
hsa-miR-16-2-3p	0.196931	0.334917	1
hsa-miR-532-5p	-0.194719	0.340484	1
hsa-miR-193a-5p	0.189589	0.353603	1
hsa-miR-21-5p	0.188947	0.355265	1
hsa-miR-376a-3p	0.173004	0.398017	1
hsa-miR-144-3p	0.167345	0.413861	1
hsa-miR-197-3p	-0.167325	0.413918	1
hsa-miR-125a-5p	-0.160489	0.433517	1
hsa-miR-421	-0.159256	0.437105	1
hsa-let-7d-3p	0.158726	0.438653	1
hsa-miR-25-3p	0.156987	0.443749	1
hsa-miR-28-3p	-0.15681	0.44427	1
hsa-miR-335-5p	0.149141	0.46713	1
hsa-miR-210-3p	-0.1486	0.468769	1
hsa-miR-15b-3p	-0.14701	0.473591	1
hsa-let-7b-5p	0.146509	0.475116	1
hsa-miR-152-3p	0.143824	0.483332	1
hsa-let-7b-3p	0.142825	0.486409	1
hsa-miR-154-5p	0.140862	0.492483	1
hsa-miR-335-3p	-0.139216	0.497603	1
hsa-miR-1	-0.138547	0.499691	1
hsa-miR-877-5p	-0.133944	0.514181	1
hsa-miR-590-5p	0.130483	0.525208	1
hsa-miR-141-3p	-0.129369	0.528781	1
hsa-miR-99b-5p	-0.127976	0.533267	1
hsa-miR-136-3p	0.126775	0.537145	1
hsa-miR-376c-3p	0.126247	0.538856	1
hsa-miR-136-5p	0.126142	0.539198	1
hsa-miR-574-3p	-0.125241	0.542121	1
hsa-let-7e-5p	-0.124706	0.543863	1
hsa-miR-185-5p	-0.11396	0.579361	1
hsa-miR-543	0.111833	0.586508	1
hsa-miR-409-3p	-0.108502	0.597773	1
hsa-miR-130a-3p	0.106471	0.604687	1
hsa-miR-195-5p	0.105852	0.606801	1
hsa-miR-133a-3p	-0.103528	0.614765	1
hsa-miR-342-3p	-0.0996939	0.627995	1
hsa-miR-532-3p	0.0948617	0.644831	1
hsa-miR-106b-5p	-0.0933455	0.65015	1
hsa-miR-34a-5p	0.0916585	0.656087	1
hsa-miR-29a-3p	0.0914874	0.65669	1
hsa-miR-495-3p	0.0853862	0.678338	1
hsa-miR-132-3p	-0.0843685	0.681974	1
hsa-miR-140-3p	0.0835862	0.684774	1
hsa-miR-155-5p	0.0793689	0.699935	1
hsa-miR-29c-3p	0.0769291	0.708757	1
hsa-miR-339-3p	-0.0717325	0.727671	1
hsa-miR-584-5p	0.0667457	0.745968	1
hsa-miR-142-3p	0.0662364	0.747844	1
hsa-miR-7-5p	0.063587	0.757628	1
hsa-miR-29b-3p	0.0566001	0.7836	1
hsa-miR-133b	-0.0511225	0.804122	1
hsa-miR-20a-5p	-0.0468332	0.820281	1
hsa-miR-361-5p	-0.043754	0.831926	1
hsa-miR-200c-3p	0.0426082	0.836269	1
hsa-miR-485-3p	-0.0425143	0.836625	1
hsa-let-7i-5p	-0.0416177	0.840026	1
hsa-let-7a-5p	-0.0394454	0.848279	1
hsa-let-7f-5p	-0.0377284	0.854813	1
hsa-miR-326	0.0369808	0.85766	1
hsa-miR-20b-5p	0.0271636	0.895206	1
hsa-miR-328-3p	-0.0242302	0.906471	1
hsa-miR-92b-3p	0.0206876	0.920099	1
hsa-miR-2110	0.0113482	0.956122	1
hsa-miR-629-5p	-0.0107463	0.958447	1
hsa-miR-30c-5p	-0.00685233	0.973498	1
hsa-miR-501-3p	0.00653095	0.97474	1
hsa-miR-451a	-0.00431138	0.983323	1
hsa-miR-181a-5p	0.00404457	0.984355	1

## Sheet: PANSS general psychopathy
miRNAs names	Pearson's correlation coefficients	p values	Benjamini–Hochberg corrected p values
hsa-miR-18b-5p	-0.558395	0.00302995	0.419105
hsa-miR-17-5p	-0.550393	0.00357528	0.471409
hsa-miR-19b-3p	-0.532553	0.00509766	0.595294
hsa-miR-30e-5p	-0.516658	0.00688426	0.703533
hsa-miR-324-5p	-0.50509	0.00849255	0.7752
hsa-miR-18a-5p	-0.493184	0.0104644	0.839652
hsa-miR-19a-3p	-0.492697	0.0105526	0.840435
hsa-miR-200c-3p	-0.472431	0.014808	0.923159
hsa-miR-2110	0.465291	0.0166086	0.942955
hsa-miR-26b-5p	-0.446036	0.022377	0.978663
hsa-miR-374b-5p	-0.440176	0.0244247	0.984686
hsa-miR-136-3p	0.422046	0.0317398	0.995567
hsa-let-7g-5p	-0.415403	0.0348233	0.997313
hsa-miR-223-3p	-0.412646	0.0361712	0.997792
hsa-miR-26a-5p	-0.407043	0.0390387	0.998599
hsa-miR-24-3p	-0.403164	0.0411274	0.99898
hsa-miR-375	0.402908	0.0412683	0.99898
hsa-miR-324-3p	-0.401179	0.0422298	0.999079
hsa-miR-30b-5p	-0.396444	0.0449547	0.999392
hsa-miR-199a-5p	-0.383342	0.0532216	0.999842
hsa-miR-301a-3p	-0.374608	0.0593612	0.999941
hsa-miR-154-5p	0.374079	0.0597496	0.999941
hsa-miR-362-3p	0.373816	0.0599436	0.999941
hsa-miR-374a-5p	-0.372594	0.0608523	0.999944
hsa-miR-126-3p	-0.371373	0.06177	0.999949
hsa-miR-1260a	0.371284	0.0618368	0.999949
hsa-miR-148a-3p	0.367397	0.0648329	0.999965
hsa-miR-100-5p	0.366641	0.0654281	0.999966
hsa-miR-423-3p	-0.366189	0.0657865	0.999966
hsa-miR-151a-5p	-0.365454	0.066372	0.999966
hsa-let-7d-5p	-0.354507	0.0755742	0.999992
hsa-miR-93-3p	-0.351767	0.0780238	0.999994
hsa-miR-382-5p	0.349301	0.0802785	0.999995
hsa-miR-191-5p	-0.3421	0.0871484	0.999998
hsa-miR-30d-5p	-0.341964	0.087282	0.999998
hsa-miR-16-5p	-0.339958	0.0892753	0.999999
hsa-miR-28-5p	-0.335841	0.093472	0.999999
hsa-miR-423-5p	0.33186	0.0976699	1
hsa-miR-106a-5p	-0.330834	0.0987741	1
hsa-miR-365a-3p	0.329916	0.0997701	1
hsa-miR-143-3p	-0.327724	0.102178	1
hsa-miR-376a-3p	0.327133	0.102835	1
hsa-miR-151a-3p	-0.323408	0.107047	1
hsa-miR-146b-5p	-0.316595	0.115078	1
hsa-miR-7-1-3p	-0.31412	0.118102	1
hsa-miR-223-5p	-0.299343	0.137385	1
hsa-miR-30e-3p	-0.297946	0.13932	1
hsa-miR-140-5p	-0.297007	0.14063	1
hsa-miR-126-5p	-0.287224	0.154819	1
hsa-miR-103a-3p	-0.282924	0.161366	1
hsa-miR-21-5p	0.28036	0.165363	1
hsa-miR-421	-0.280058	0.165837	1
hsa-miR-186-5p	-0.275305	0.173444	1
hsa-miR-136-5p	0.270747	0.180964	1
hsa-miR-339-5p	-0.270222	0.181844	1
hsa-miR-376c-3p	0.265412	0.190051	1
hsa-miR-1	-0.263166	0.193967	1
hsa-miR-99a-5p	0.256545	0.205838	1
hsa-miR-409-3p	0.254316	0.209942	1
hsa-miR-23b-3p	-0.25344	0.211572	1
hsa-miR-195-5p	0.248573	0.220773	1
hsa-miR-495-3p	0.248104	0.221674	1
hsa-miR-484	0.246755	0.224278	1
hsa-miR-93-5p	-0.244312	0.229047	1
hsa-miR-130b-3p	0.240368	0.236888	1
hsa-miR-32-5p	0.240263	0.237099	1
hsa-miR-497-5p	0.235465	0.246878	1
hsa-miR-106b-3p	-0.232731	0.252568	1
hsa-miR-320a	0.232619	0.252804	1
hsa-miR-10b-5p	0.231077	0.256052	1
hsa-miR-92a-3p	0.231055	0.256099	1
mmu-miR-378a-3p	0.230955	0.256309	1
hsa-miR-101-3p	0.230616	0.257027	1
hsa-miR-199a-3p	-0.228347	0.261869	1
hsa-miR-208a-3p	0.2254	0.268242	1
hsa-miR-27b-3p	-0.225034	0.269042	1
hsa-miR-125a-5p	-0.223916	0.271491	1
hsa-miR-501-3p	-0.219706	0.280841	1
hsa-miR-194-5p	0.213445	0.295119	1
hsa-miR-152-3p	0.211123	0.300527	1
hsa-miR-139-5p	-0.210135	0.302846	1
hsa-miR-27a-3p	-0.209015	0.305491	1
hsa-miR-221-3p	-0.207693	0.308628	1
hsa-miR-320d	0.207603	0.308844	1
hsa-miR-133a-3p	0.20407	0.317332	1
hsa-miR-629-5p	0.202546	0.321038	1
hsa-miR-28-3p	-0.194877	0.340084	1
hsa-miR-125b-5p	0.194146	0.341934	1
hsa-miR-766-3p	-0.192453	0.346241	1
hsa-miR-486-5p	0.189082	0.354916	1
hsa-miR-142-5p	-0.185035	0.365496	1
hsa-miR-335-5p	0.184643	0.366529	1
hsa-miR-146a-5p	-0.183402	0.369816	1
hsa-miR-145-5p	-0.178609	0.382669	1
hsa-miR-502-3p	0.178182	0.383825	1
hsa-miR-33a-5p	-0.178064	0.384147	1
hsa-miR-29b-3p	0.172207	0.400229	1
hsa-miR-652-3p	-0.169651	0.407364	1
hsa-miR-342-3p	-0.169436	0.407969	1
hsa-miR-331-3p	-0.169227	0.408556	1
hsa-miR-320b	0.166499	0.416261	1
hsa-let-7c-5p	-0.164898	0.42082	1
hsa-miR-320c	0.163075	0.426046	1
hsa-miR-192-5p	0.161242	0.431333	1
hsa-miR-451a	-0.159099	0.437564	1
hsa-miR-23a-3p	-0.15639	0.445506	1
hsa-let-7f-5p	-0.156373	0.445557	1
hsa-miR-210-3p	-0.154939	0.44979	1
hsa-miR-454-3p	-0.154827	0.450124	1
hsa-miR-222-3p	0.154669	0.450589	1
hsa-miR-660-5p	0.152712	0.456412	1
hsa-miR-155-5p	0.149138	0.46714	1
hsa-miR-148b-3p	0.144805	0.480322	1
hsa-miR-15b-5p	-0.143345	0.484807	1
hsa-miR-30c-5p	-0.142745	0.486654	1
hsa-miR-106b-5p	-0.139272	0.497429	1
hsa-let-7d-3p	0.139249	0.497499	1
hsa-miR-7-5p	-0.138526	0.499758	1
hsa-miR-200a-3p	0.138043	0.501267	1
hsa-miR-425-3p	-0.13584	0.508188	1
hsa-miR-20b-5p	-0.131255	0.522738	1
hsa-miR-874-3p	0.126315	0.538635	1
hsa-miR-142-3p	0.123955	0.54631	1
hsa-miR-532-3p	0.115861	0.573007	1
hsa-miR-22-3p	-0.112089	0.585644	1
hsa-miR-132-3p	0.111381	0.588029	1
hsa-let-7i-5p	0.1112	0.588641	1
hsa-miR-15a-5p	0.110807	0.589966	1
hsa-miR-30a-5p	0.110601	0.590664	1
hsa-miR-92b-3p	0.109444	0.594578	1
hsa-miR-338-3p	-0.109016	0.596028	1
hsa-let-7a-5p	-0.106043	0.606149	1
hsa-miR-144-5p	0.105996	0.606307	1
hsa-miR-483-5p	0.104351	0.61194	1
hsa-miR-107	-0.101575	0.62149	1
hsa-miR-20a-5p	-0.0989359	0.630625	1
hsa-miR-185-5p	-0.0979268	0.634132	1
hsa-miR-425-5p	0.0927282	0.65232	1
hsa-miR-543	0.091777	0.655669	1
hsa-miR-215-5p	0.0915882	0.656335	1
hsa-miR-532-5p	-0.0906262	0.65973	1
hsa-miR-29c-3p	0.0906065	0.6598	1
hsa-miR-424-5p	0.0899974	0.661953	1
hsa-miR-29a-3p	0.0780196	0.70481	1
hsa-let-7b-5p	0.0775631	0.706461	1
hsa-miR-335-3p	0.0771122	0.708094	1
hsa-miR-584-5p	0.0750179	0.715694	1
hsa-miR-141-3p	0.069572	0.735581	1
hsa-miR-505-3p	-0.0693434	0.736419	1
hsa-miR-34a-5p	-0.0677841	0.742146	1
hsa-miR-205-5p	-0.066421	0.747164	1
hsa-miR-885-5p	0.0635532	0.757753	1
hsa-miR-877-5p	0.0618387	0.764104	1
hsa-miR-193a-5p	0.061484	0.765419	1
hsa-miR-339-3p	0.0604515	0.769253	1
hsa-miR-16-2-3p	0.0575588	0.780022	1
hsa-miR-574-3p	-0.0551896	0.788871	1
hsa-let-7b-3p	0.0544843	0.791511	1
hsa-miR-328-3p	-0.0532569	0.796109	1
hsa-miR-15b-3p	-0.0487993	0.812865	1
hsa-miR-25-3p	0.0451482	0.826649	1
hsa-miR-485-3p	0.0426152	0.836242	1
hsa-miR-363-3p	0.0425539	0.836475	1
hsa-miR-22-5p	0.0408088	0.843098	1
hsa-miR-590-5p	0.039357	0.848615	1
hsa-miR-361-5p	-0.0353478	0.863887	1
hsa-miR-140-3p	-0.0323174	0.875463	1
hsa-miR-144-3p	0.0282664	0.890976	1
hsa-miR-197-3p	-0.0271614	0.895215	1
hsa-miR-150-5p	0.0237473	0.908327	1
hsa-miR-128-3p	0.0228563	0.911753	1
hsa-miR-130a-3p	0.02138	0.917434	1
hsa-let-7e-5p	0.0199935	0.922772	1
hsa-miR-99b-5p	0.0158087	0.938903	1
hsa-miR-326	-0.0154348	0.940345	1
hsa-miR-133b	0.0151659	0.941383	1
hsa-miR-181a-5p	-0.0100937	0.960969	1
hsa-miR-122-5p	0.00415565	0.983926	1
hsa-miR-127-3p	-0.00341203	0.986802	1
