# Supplementary material for: Circulating microRNA Profiles Identify a Patient Subgroup with High Inflammation and Severe Symptoms in Schizophrenia Experiencing Acute Psychosis
Source: Int J Mol Sci. 2024 Apr 12;25(8):4291. doi: 10.3390/ijms25084291 (PMC11050142; doi:10.3390/ijms25084291)
Supplement: Supplementary file 1 [file ijms-25-04291-s001.zip › Supplementary Table S3_MicroRNA set enrichment results (without filtering).xlsx]

## Sheet: Downregulated miRNAs, subgroup1
Term	Category	Count	Percent	Fold	P-value	miRNA	q
pancreas	Tissue Specificity	2	0.333333	146.333	5.82e-05	hsa-mir-194-1,hsa-mir-194-2	0.0013968
Aging	Function	3	0.0476191	20.9048	0.000172	hsa-mir-194-2,hsa-mir-194-1,hsa-mir-144	0.002064
Epithelial-to-Mesenchymal Transition	Function	3	0.0361446	15.8675	0.000394	hsa-mir-194-2,hsa-mir-194-1,hsa-mir-144	0.003152
Adipogenesis	Function	2	0.1	43.9	0.00073	hsa-mir-194-2,hsa-mir-194-1	0.00386
Circadian Rhythm	Function	2	0.0909091	39.9091	0.000886	hsa-mir-194-2,hsa-mir-194-1	0.00386
Inflammation	Function	3	0.0267857	11.7589	0.000965	hsa-mir-194-2,hsa-mir-144,hsa-mir-194-1	0.00386
Cell Differentiation	Function	2	0.0357143	15.6786	0.00575	hsa-mir-194-2,hsa-mir-194-1	0.01914
Osteogenesis	Function	2	0.0338983	14.8814	0.00638	hsa-mir-194-2,hsa-mir-194-1	0.01914
Megakaryocyte Differentiation	Function	1	0.2	87.8	0.0114	hsa-mir-10b	0.0304
Autophagy	Function	1	0.125	54.875	0.0181	hsa-mir-144	0.0408
Vascular Smooth Muscle Cell Differentiation	Function	1	0.111111	48.7778	0.0204	hsa-mir-144	0.0408
Cholesterol Homeostasis	Function	1	0.111111	48.7778	0.0204	hsa-mir-144	0.0408
Neurotoxicity	Function	1	0.05	21.95	0.0448	hsa-mir-10b	0.0752
brain.cerebellum	Tissue Specificity	1	0.0476191	20.9048	0.047	hsa-mir-144	0.0752
Cell Motility	Function	1	0.0476191	20.9048	0.047	hsa-mir-10b	0.0752
Glucose Metabolism	Function	1	0.0357143	15.6786	0.0623	hsa-mir-144	0.09345
Brain Development	Function	1	0.0277778	12.1944	0.0796	hsa-mir-10b	0.106133
Toxicity	Function	1	0.0277778	12.1944	0.0796	hsa-mir-144	0.106133
Lipid Metabolism	Function	1	0.0222222	9.75556	0.0987	hsa-mir-10b	0.124674
Hematopoiesis	Function	1	0.0175439	7.70175	0.1238	hsa-mir-144	0.14856
Angiogenesis	Function	1	0.0153846	6.75385	0.1402	hsa-mir-10b	0.160229
Cell Death	Function	1	0.0128205	5.62821	0.1663	hsa-mir-10b	0.175617
Regulation of Stem Cell	Function	1	0.0126582	5.55696	0.1683	hsa-mir-144	0.175617
Apoptosis	Function	1	0.00943396	4.14151	0.2206	hsa-mir-144	0.2206

## Sheet: Upregulated miRNAs, subgroup2
Term	Category	Count	Percent	Fold	P-value	miRNA	q
brain.cerebellum	Tissue Specificity	5	0.238095	69.6825	8.76e-10	hsa-mir-16-1,hsa-mir-16-2,hsa-mir-19b-1,hsa-mir-19b-2,hsa-mir-19a	2.5404e-08
Immune Response	Function	6	0.0652174	19.087	1.77e-08	hsa-mir-186,hsa-mir-16-2,hsa-mir-19b-1,hsa-mir-16-1,hsa-mir-19b-2,hsa-mir-19a	2.5665e-07
Angiogenesis	Function	5	0.0769231	22.5128	3.48e-07	hsa-mir-19b-1,hsa-mir-16-1,hsa-mir-19b-2,hsa-mir-16-2,hsa-mir-19a	3.364e-06
Cell Death	Function	5	0.0641026	18.7607	8.84e-07	hsa-mir-19b-1,hsa-mir-16-1,hsa-mir-19b-2,hsa-mir-16-2,hsa-mir-19a	6.409e-06
Cell Cycle	Function	5	0.060241	17.6305	1.21e-06	hsa-mir-19b-1,hsa-mir-16-1,hsa-mir-19b-2,hsa-mir-16-2,hsa-mir-19a	7.018e-06
Apoptosis	Function	5	0.0471698	13.805	4.18e-06	hsa-mir-16-2,hsa-mir-19b-1,hsa-mir-16-1,hsa-mir-19b-2,hsa-mir-19a	2.02033e-05
Neurotoxicity	Function	3	0.15	43.9	2.48e-05	hsa-mir-16-2,hsa-mir-19a,hsa-mir-16-1	0.000102743
Regulation of Akt Pathway	Function	3	0.115385	33.7692	5.6e-05	hsa-mir-19b-1,hsa-mir-19b-2,hsa-mir-19a	0.000203
Chemosensitivity Of Tumor Cells	Function	2	0.25	73.1667	0.00027	hsa-mir-16-1,hsa-mir-16-2	0.00087
nerve.not_specified	Tissue Specificity	2	0.222222	65.037	0.000347	hsa-mir-16-1,hsa-mir-16-2	0.0010063
Hormone-mediated Signaling Pathway	Function	3	0.0517241	15.1379	0.000638	hsa-mir-16-1,hsa-mir-16-2,hsa-mir-19a	0.001682
T-Cell Differentiation	Function	2	0.125	36.5833	0.00114	hsa-mir-16-1,hsa-mir-16-2	0.00254308
DNA Damage Response	Function	2	0.125	36.5833	0.00114	hsa-mir-16-2,hsa-mir-16-1	0.00254308
Cell Division	Function	2	0.117647	34.4314	0.00129	hsa-mir-16-2,hsa-mir-16-1	0.00267214
Circadian Rhythm	Function	2	0.0909091	26.6061	0.00218	hsa-mir-16-1,hsa-mir-16-2	0.00421467
Toxicity	Function	2	0.0555556	16.2593	0.00582	hsa-mir-16-1,hsa-mir-16-2	0.0105487
Endothelial Cell Apoptosis	Function	1	0.5	146.333	0.00682	hsa-mir-19a	0.0116341
Cell Proliferation(Hwang Etal Bjc2007)	Function	1	0.25	73.1667	0.0136	hsa-mir-19a	0.0210632
Cell Differentiation	Function	2	0.0357143	10.4524	0.0138	hsa-mir-16-1,hsa-mir-16-2	0.0210632
Aging	Function	2	0.031746	9.29101	0.0173	hsa-mir-16-1,hsa-mir-16-2	0.025085
Cell Proliferation	Function	2	0.025	7.31667	0.0273	hsa-mir-16-1,hsa-mir-16-2	0.0377
Carbohydrate Metabolism	Function	1	0.111111	32.5185	0.0304	hsa-mir-186	0.0400727
Nephrotoxicity	Function	1	0.0588235	17.2157	0.0568	hsa-mir-186	0.0716174
Immune System(Xiao's Cell2010)	Function	1	0.0476191	13.9365	0.0697	hsa-mir-19a	0.0842208
Bone Regeneration	Function	1	0.0333333	9.75556	0.0984	hsa-mir-19a	0.114144
Adipocyte Differentiation	Function	1	0.0243902	7.13821	0.1323	hsa-mir-19a	0.1421
myocardium	Tissue Specificity	1	0.0243902	7.13821	0.1323	hsa-mir-186	0.1421
Hematopoiesis	Function	1	0.0175439	5.1345	0.1799	hsa-mir-19a	0.186325
Inflammation	Function	1	0.00892857	2.6131	0.327	hsa-mir-19a	0.327

## Sheet: Upregulated miRNAs, subgroup3
Term	Category	Count	Percent	Fold	P-value	miRNA	q
brain.cerebellum	Tissue Specificity	7	0.333333	53.2121	3.7e-12	hsa-mir-16-1,hsa-mir-16-2,hsa-mir-451a,hsa-mir-25,hsa-mir-363,hsa-mir-144,hsa-mir-20b	1.85e-10
Aging	Function	6	0.0952381	15.2035	6.75e-07	hsa-let-7b,hsa-mir-16-1,hsa-mir-30a,hsa-mir-16-2,hsa-mir-451a,hsa-mir-144	1.6875e-05
Angiogenesis	Function	5	0.0769231	12.2797	2.32e-05	hsa-let-7b,hsa-mir-16-1,hsa-mir-30a,hsa-mir-16-2,hsa-mir-363	0.000386667
T-Cell Differentiation	Function	3	0.1875	29.9318	9.81e-05	hsa-mir-16-1,hsa-let-7b,hsa-mir-16-2	0.00119
Cell Division	Function	3	0.176471	28.1711	0.000119	hsa-let-7b,hsa-mir-16-2,hsa-mir-16-1	0.00119
Neurotoxicity	Function	3	0.15	23.9455	0.000197	hsa-mir-16-2,hsa-mir-25,hsa-mir-16-1	0.00163571
Immune System(Xiao's Cell2010)	Function	3	0.142857	22.8052	0.000229	hsa-mir-20b,hsa-mir-25,hsa-mir-363	0.00163571
Hematopoiesis	Function	4	0.0701754	11.2026	0.000278	hsa-let-7b,hsa-mir-20b,hsa-mir-363,hsa-mir-144	0.0017375
Cell Death	Function	4	0.0512821	8.18648	0.000938	hsa-let-7b,hsa-mir-16-1,hsa-mir-16-2,hsa-mir-25	0.00416667
Autophagy	Function	2	0.25	39.9091	0.000979	hsa-mir-30a,hsa-mir-144	0.00416667
Chemosensitivity Of Tumor Cells	Function	2	0.25	39.9091	0.000979	hsa-mir-16-1,hsa-mir-16-2	0.00416667
Cell Proliferation	Function	4	0.05	7.98182	0.00103	hsa-let-7b,hsa-mir-16-1,hsa-mir-16-2,hsa-mir-451a	0.00416667
Toxicity	Function	3	0.0833333	13.303	0.00117	hsa-mir-16-1,hsa-mir-16-2,hsa-mir-144	0.00416667
Epithelial-to-Mesenchymal Transition	Function	4	0.0481928	7.69332	0.00119	hsa-let-7b,hsa-mir-30a,hsa-mir-451a,hsa-mir-144	0.00416667
nerve.not_specified	Tissue Specificity	2	0.222222	35.4747	0.00125	hsa-mir-16-1,hsa-mir-16-2	0.00416667
Immune Response	Function	4	0.0434783	6.94071	0.00175	hsa-mir-16-2,hsa-mir-16-1,hsa-mir-30a,hsa-mir-25	0.00546875
Apoptosis	Function	4	0.0377359	6.02401	0.00298	hsa-mir-16-2,hsa-mir-144,hsa-mir-16-1,hsa-mir-30a	0.00876471
DNA Damage Response	Function	2	0.125	19.9545	0.00408	hsa-mir-16-2,hsa-mir-16-1	0.0111316
Cell Differentiation	Function	3	0.0535714	8.55195	0.00423	hsa-let-7b,hsa-mir-16-1,hsa-mir-16-2	0.0111316
Hormone-mediated Signaling Pathway	Function	3	0.0517241	8.25705	0.00467	hsa-mir-16-1,hsa-mir-16-2,hsa-mir-363	0.011675
Circadian Rhythm	Function	2	0.0909091	14.5124	0.0077	hsa-mir-16-1,hsa-mir-16-2	0.0183333
Regulation of Stem Cell	Function	3	0.0379747	6.06214	0.0111	hsa-mir-25,hsa-mir-451a,hsa-mir-144	0.0252273
Glucose Metabolism	Function	2	0.0714286	11.4026	0.0123	hsa-let-7b,hsa-mir-144	0.0266667
Cell Cycle	Function	3	0.0361446	5.76999	0.0128	hsa-let-7b,hsa-mir-16-1,hsa-mir-16-2	0.0266667
Bone Regeneration	Function	2	0.0666667	10.6424	0.0141	hsa-let-7b,hsa-mir-20b	0.0282
Chemotaxis	Function	1	0.333333	53.2121	0.0187	hsa-mir-451a	0.0359615
Innate Immunity	Function	2	0.0476191	7.60173	0.0268	hsa-let-7b,hsa-mir-30a	0.0496296
Inflammation	Function	3	0.0267857	4.27597	0.0286	hsa-mir-20b,hsa-mir-144,hsa-mir-25	0.0510714
Hepatic Stellate Cell Differentiation	Function	1	0.2	31.9273	0.031	hsa-let-7b	0.0534483
testis	Tissue Specificity	2	0.0425532	6.79304	0.0331	hsa-mir-454,hsa-let-7b	0.0551667
Chondrogenic Differentiation	Function	1	0.166667	26.6061	0.0371	hsa-mir-30a	0.0598387
Anti-Cell Proliferation(Hwang Etal Bjc2007)	Function	1	0.125	19.9545	0.0491	hsa-let-7b	0.0743939
T-Cell Activation	Function	1	0.125	19.9545	0.0491	hsa-mir-451a	0.0743939
Cholesterol Homeostasis	Function	1	0.111111	17.7374	0.0551	hsa-mir-144	0.0744595
Vascular Smooth Muscle Cell Differentiation	Function	1	0.111111	17.7374	0.0551	hsa-mir-144	0.0744595
Erythrocyte Differentiation	Function	1	0.111111	17.7374	0.0551	hsa-mir-451a	0.0744595
Carbohydrate Metabolism	Function	1	0.111111	17.7374	0.0551	hsa-mir-451a	0.0744595
Folliculogenesis	Function	1	0.0909091	14.5124	0.067	hsa-let-7b	0.0881579
Nephrotoxicity	Function	1	0.0588235	9.39037	0.1018	hsa-mir-30a	0.12725
Embryonic Development	Function	1	0.0588235	9.39037	0.1018	hsa-mir-20b	0.12725
T-helper 17 Cell Differentiation	Function	1	0.0526316	8.40191	0.1131	hsa-mir-20b	0.137927
Adipogenesis	Function	1	0.05	7.98182	0.1187	hsa-mir-363	0.138023
Pluripotent Stem Cells Reprogramming	Function	1	0.05	7.98182	0.1187	hsa-let-7b	0.138023
Muscle Development	Function	1	0.0476191	7.60173	0.1243	hsa-mir-30a	0.14125
Skeletal Muscle Cell Differentiation	Function	1	0.0454546	7.2562	0.1298	hsa-mir-30a	0.144222
Peritoneal Cavity Homeostasis(26495316)	Function	1	0.0434783	6.94071	0.1354	hsa-mir-30a	0.147174
Embryonic Stem Cell Differentiation	Function	1	0.0322581	5.14956	0.1784	hsa-mir-25	0.189787
Adipocyte Differentiation	Function	1	0.0243902	3.89357	0.2294	hsa-let-7b	0.238958
small_intestine.duodenum	Tissue Specificity	1	0.0222222	3.54747	0.249	hsa-mir-30a	0.254082
Osteogenesis	Function	1	0.0169491	2.7057	0.3141	hsa-mir-30a	0.3141

## Sheet: Downregulated miRNAs, subgroup3
Term	Category	Count	Percent	Fold	P-value	miRNA	q
kidney.cortex_renalis	Tissue Specificity	7	0.170732	13.035	4.15e-07	hsa-mir-495,hsa-mir-376c,hsa-mir-136,hsa-mir-154,hsa-mir-376a-1,hsa-mir-376a-2,hsa-mir-382	3.2785e-05
Neuron Apoptosis	Function	4	0.266667	20.3594	2.78e-05	hsa-mir-23a,hsa-mir-27b,hsa-mir-27a,hsa-mir-23b	0.000969067
DNA Damage Response	Function	4	0.25	19.087	3.68e-05	hsa-mir-146a,hsa-mir-23a,hsa-mir-130a,hsa-mir-27a	0.000969067
Adipocyte Differentiation	Function	5	0.121951	9.31071	0.000134	hsa-mir-23a,hsa-let-7d,hsa-mir-130a,hsa-mir-27b,hsa-mir-27a	0.001659
Cholesterol Hydrolysis	Function	2	1	76.3478	0.000164	hsa-mir-27a,hsa-mir-27b	0.001659
Cholesterol Influx	Function	2	1	76.3478	0.000164	hsa-mir-27a,hsa-mir-27b	0.001659
Cholesterol Esterification	Function	2	1	76.3478	0.000164	hsa-mir-27a,hsa-mir-27b	0.001659
Peritoneal Cavity Homeostasis(26495316)	Function	4	0.173913	13.2779	0.000168	hsa-mir-136,hsa-let-7d,hsa-mir-152,hsa-mir-335	0.001659
Placenta	Tissue Specificity	3	0.272727	20.8221	0.000303	hsa-mir-154,hsa-mir-376a-1,hsa-mir-376a-2	0.00265967
Inflammation	Function	7	0.0625	4.77174	0.000372	hsa-mir-584,hsa-let-7d,hsa-mir-335,hsa-mir-27b,hsa-mir-146a,hsa-mir-328,hsa-mir-27a	0.0029388
Osteogenesis	Function	5	0.0847458	6.47015	0.000763	hsa-mir-382,hsa-mir-543,hsa-mir-148b,hsa-mir-495,hsa-mir-27a	0.00547973
myocardium	Tissue Specificity	4	0.097561	7.44857	0.00164	hsa-mir-376c,hsa-mir-136,hsa-mir-376a-2,hsa-mir-27b	0.0100877
T-helper 17 Cell Differentiation	Function	3	0.157895	12.0549	0.00166	hsa-mir-27b,hsa-mir-27a,hsa-mir-152	0.0100877
Endothelial Cell Proliferation	Function	2	0.333333	25.4493	0.00239	hsa-mir-23b,hsa-mir-152	0.0134864
Cell Death	Function	5	0.0641026	4.89409	0.00273	hsa-mir-23a,hsa-let-7d,hsa-mir-146a,hsa-mir-23b,hsa-mir-376c	0.014378
Cellular Senescence	Function	2	0.285714	21.8137	0.00331	hsa-mir-335,hsa-mir-23a	0.0163431
Glucose Metabolism	Function	3	0.107143	8.18012	0.0052	hsa-mir-23a,hsa-let-7d,hsa-mir-23b	0.0241647
Immune Response	Function	5	0.0543478	4.14934	0.00562	hsa-mir-326,hsa-mir-27b,hsa-mir-146a,hsa-mir-328,hsa-mir-27a	0.0246656
Hormone-mediated Signaling Pathway	Function	4	0.0689655	5.26537	0.00594	hsa-mir-23a,hsa-mir-146a,hsa-mir-23b,hsa-mir-27a	0.0246979
Bone Regeneration	Function	3	0.1	7.63478	0.00633	hsa-mir-148b,hsa-let-7d,hsa-mir-23b	0.0250035
Granulopoiesis	Function	2	0.2	15.2696	0.00693	hsa-let-7d,hsa-mir-130a	0.02607
Cell Migration	Function	2	0.181818	13.8814	0.0084	hsa-mir-146a,hsa-mir-152	0.0301636
Angiogenesis	Function	4	0.0615385	4.69833	0.00891	hsa-mir-382,hsa-mir-146a,hsa-mir-130a,hsa-mir-27b	0.0306039
Apoptosis	Function	5	0.0471698	3.60131	0.0102	hsa-mir-130a,hsa-mir-326,hsa-mir-23a,hsa-mir-146a,hsa-mir-27a	0.033575
Cholesterol Efflux	Function	2	0.133333	10.1797	0.0155	hsa-mir-27b,hsa-mir-27a	0.04898
Innate Immunity	Function	3	0.0714286	5.45342	0.0162	hsa-mir-136,hsa-let-7d,hsa-mir-146a	0.0492231
Cell Proliferation	Function	4	0.05	3.81739	0.0183	hsa-let-7d,hsa-mir-146a,hsa-mir-130a,hsa-mir-27b	0.0504581
Lipid Metabolism	Function	3	0.0666667	5.08986	0.0195	hsa-mir-335,hsa-mir-27b,hsa-mir-27a	0.0504581
Nephrotoxicity	Function	2	0.117647	8.9821	0.0198	hsa-let-7d,hsa-mir-130a	0.0504581
Cell Division	Function	2	0.117647	8.9821	0.0198	hsa-mir-27a,hsa-let-7d	0.0504581
Cardiotoxicity	Function	2	0.117647	8.9821	0.0198	hsa-mir-146a,hsa-mir-130a	0.0504581
Insulin Resistance	Function	2	0.111111	8.48309	0.0221	hsa-mir-543,hsa-mir-130a	0.0529061
kidney.medulla_renalis	Tissue Specificity	2	0.111111	8.48309	0.0221	hsa-mir-154,hsa-mir-543	0.0529061
Antiviral Immunity	Function	1	0.5	38.1739	0.026	hsa-mir-23a	0.0570556
Osteoblast Apoptosis	Function	1	0.5	38.1739	0.026	hsa-mir-27a	0.0570556
Keratinocyte Proliferation(26402295;26402295;25654102)	Function	1	0.5	38.1739	0.026	hsa-mir-136	0.0570556
Skeletal Muscle Cell Differentiation	Function	2	0.0909091	6.94071	0.0323	hsa-mir-136,hsa-mir-146a	0.0689649
Cell Differentiation	Function	3	0.0535714	4.09006	0.0346	hsa-mir-136,hsa-let-7d,hsa-mir-495	0.0719316
Aging	Function	3	0.0476191	3.63561	0.0467	hsa-mir-543,hsa-let-7d,hsa-mir-146a	0.0945974
lymph_node	Tissue Specificity	1	0.25	19.087	0.0514	hsa-mir-136	0.096681
Dendritic Cell Differentiation	Function	1	0.25	19.087	0.0514	hsa-mir-23a	0.096681
Mesenchymal-to-Epithelial Transition	Function	1	0.25	19.087	0.0514	hsa-mir-23a	0.096681
Natural Killer Cell Activation	Function	1	0.2	15.2696	0.0639	hsa-mir-23a	0.117398
Chondrogenic Differentiation	Function	1	0.166667	12.7246	0.0762	hsa-mir-495	0.133773
Toll-Like Receptor Signaling Pathway	Function	1	0.166667	12.7246	0.0762	hsa-mir-146a	0.133773
Regulation of Nf-Κb Pathway	Function	1	0.142857	10.9068	0.0883	hsa-mir-146a	0.146735
Epithelial-to-Mesenchymal Transition	Function	3	0.0361446	2.75956	0.0913	hsa-mir-382,hsa-let-7d,hsa-mir-23b	0.146735
Chemosensitivity Of Tumor Cells	Function	1	0.125	9.54348	0.1003	hsa-mir-27a	0.146735
Mesenchymal Stem Cell Proliferation	Function	1	0.125	9.54348	0.1003	hsa-mir-23a	0.146735
Response to Estrogen	Function	1	0.125	9.54348	0.1003	hsa-mir-146a	0.146735
T-Cell Activation	Function	1	0.125	9.54348	0.1003	hsa-mir-146a	0.146735
Autophagy	Function	1	0.125	9.54348	0.1003	hsa-mir-382	0.146735
Anti-Cell Proliferation(Hwang Etal Bjc2007)	Function	1	0.125	9.54348	0.1003	hsa-let-7d	0.146735
Transdifferentiation	Function	1	0.125	9.54348	0.1003	hsa-mir-27a	0.146735
Cardiac Remodeling	Function	1	0.111111	8.48309	0.1121	hsa-mir-146a	0.158141
Carbohydrate Metabolism	Function	1	0.111111	8.48309	0.1121	hsa-mir-27b	0.158141
Oxidative Stress	Function	1	0.1	7.63478	0.1238	hsa-mir-146a	0.171582
Heart Development	Function	1	0.0909091	6.94071	0.1354	hsa-mir-27b	0.184424
Osteoclast Differentiation	Function	1	0.0714286	5.45342	0.1691	hsa-mir-146a	0.220034
Neuron Differentiation	Function	1	0.0714286	5.45342	0.1691	hsa-mir-376c	0.220034
Hematopoiesis	Function	2	0.0350877	2.67887	0.1699	hsa-let-7d,hsa-mir-146a	0.220034
Chondrocyte Development	Function	1	0.0666667	5.08986	0.1801	hsa-mir-146a	0.229482
T-Cell Differentiation	Function	1	0.0625	4.77174	0.1909	hsa-let-7d	0.239383
Embryonic Development	Function	1	0.0588235	4.49105	0.2016	hsa-mir-152	0.24885
spleen	Tissue Specificity	1	0.0555556	4.24155	0.2122	hsa-mir-197	0.253997
Smooth Muscle Cell Proliferation	Function	1	0.0555556	4.24155	0.2122	hsa-mir-27a	0.253997
Pluripotent Stem Cells Reprogramming	Function	1	0.05	3.81739	0.2329	hsa-mir-27b	0.270492
Neurotoxicity	Function	1	0.05	3.81739	0.2329	hsa-mir-27b	0.270492
Muscle Development	Function	1	0.0476191	3.63561	0.2431	hsa-mir-23a	0.270492
Immune System(Xiao's Cell2010)	Function	1	0.0476191	3.63561	0.2431	hsa-mir-146a	0.270492
Cell Motility	Function	1	0.0476191	3.63561	0.2431	hsa-mir-584	0.270492
Wound Healing	Function	1	0.0434783	3.31947	0.263	hsa-mir-23a	0.288569
Regulation of Stem Cell	Function	2	0.0253165	1.93286	0.2772	hsa-mir-146a,hsa-mir-27a	0.299984
Osteoblast Differentiation	Function	1	0.04	3.05391	0.2824	hsa-mir-27a	0.301481
Cell Cycle	Function	2	0.0240964	1.83971	0.2971	hsa-mir-27b,hsa-mir-27a	0.312945
Embryonic Stem Cell Differentiation	Function	1	0.0322581	2.46283	0.3379	hsa-mir-27a	0.351238
Brain Development	Function	1	0.0277778	2.12077	0.3809	hsa-mir-326	0.385783
Toxicity	Function	1	0.0277778	2.12077	0.3809	hsa-mir-27a	0.385783
testis	Tissue Specificity	1	0.0212766	1.62442	0.4663	hsa-let-7d	0.4663
Term	Category	Count	Percent	Fold	P-value	miRNA	q
kidney.cortex_renalis	Tissue Specificity	7	0.170732	13.035	4.15e-07	hsa-mir-495,hsa-mir-376c,hsa-mir-136,hsa-mir-154,hsa-mir-376a-1,hsa-mir-376a-2,hsa-mir-382	3.2785e-05
Neuron Apoptosis	Function	4	0.266667	20.3594	2.78e-05	hsa-mir-23a,hsa-mir-27b,hsa-mir-27a,hsa-mir-23b	0.000969067
DNA Damage Response	Function	4	0.25	19.087	3.68e-05	hsa-mir-146a,hsa-mir-23a,hsa-mir-130a,hsa-mir-27a	0.000969067
Adipocyte Differentiation	Function	5	0.121951	9.31071	0.000134	hsa-mir-23a,hsa-let-7d,hsa-mir-130a,hsa-mir-27b,hsa-mir-27a	0.001659
Cholesterol Hydrolysis	Function	2	1	76.3478	0.000164	hsa-mir-27a,hsa-mir-27b	0.001659
Cholesterol Influx	Function	2	1	76.3478	0.000164	hsa-mir-27a,hsa-mir-27b	0.001659
Cholesterol Esterification	Function	2	1	76.3478	0.000164	hsa-mir-27a,hsa-mir-27b	0.001659
Peritoneal Cavity Homeostasis(26495316)	Function	4	0.173913	13.2779	0.000168	hsa-mir-136,hsa-let-7d,hsa-mir-152,hsa-mir-335	0.001659
Placenta	Tissue Specificity	3	0.272727	20.8221	0.000303	hsa-mir-154,hsa-mir-376a-1,hsa-mir-376a-2	0.00265967
Inflammation	Function	7	0.0625	4.77174	0.000372	hsa-mir-584,hsa-let-7d,hsa-mir-335,hsa-mir-27b,hsa-mir-146a,hsa-mir-328,hsa-mir-27a	0.0029388
Osteogenesis	Function	5	0.0847458	6.47015	0.000763	hsa-mir-382,hsa-mir-543,hsa-mir-148b,hsa-mir-495,hsa-mir-27a	0.00547973
myocardium	Tissue Specificity	4	0.097561	7.44857	0.00164	hsa-mir-376c,hsa-mir-136,hsa-mir-376a-2,hsa-mir-27b	0.0100877
T-helper 17 Cell Differentiation	Function	3	0.157895	12.0549	0.00166	hsa-mir-27b,hsa-mir-27a,hsa-mir-152	0.0100877
Endothelial Cell Proliferation	Function	2	0.333333	25.4493	0.00239	hsa-mir-23b,hsa-mir-152	0.0134864
Cell Death	Function	5	0.0641026	4.89409	0.00273	hsa-mir-23a,hsa-let-7d,hsa-mir-146a,hsa-mir-23b,hsa-mir-376c	0.014378
Cellular Senescence	Function	2	0.285714	21.8137	0.00331	hsa-mir-335,hsa-mir-23a	0.0163431
Glucose Metabolism	Function	3	0.107143	8.18012	0.0052	hsa-mir-23a,hsa-let-7d,hsa-mir-23b	0.0241647
Immune Response	Function	5	0.0543478	4.14934	0.00562	hsa-mir-326,hsa-mir-27b,hsa-mir-146a,hsa-mir-328,hsa-mir-27a	0.0246656
Hormone-mediated Signaling Pathway	Function	4	0.0689655	5.26537	0.00594	hsa-mir-23a,hsa-mir-146a,hsa-mir-23b,hsa-mir-27a	0.0246979
Bone Regeneration	Function	3	0.1	7.63478	0.00633	hsa-mir-148b,hsa-let-7d,hsa-mir-23b	0.0250035
Granulopoiesis	Function	2	0.2	15.2696	0.00693	hsa-let-7d,hsa-mir-130a	0.02607
Cell Migration	Function	2	0.181818	13.8814	0.0084	hsa-mir-146a,hsa-mir-152	0.0301636
Angiogenesis	Function	4	0.0615385	4.69833	0.00891	hsa-mir-382,hsa-mir-146a,hsa-mir-130a,hsa-mir-27b	0.0306039
Apoptosis	Function	5	0.0471698	3.60131	0.0102	hsa-mir-130a,hsa-mir-326,hsa-mir-23a,hsa-mir-146a,hsa-mir-27a	0.033575
Cholesterol Efflux	Function	2	0.133333	10.1797	0.0155	hsa-mir-27b,hsa-mir-27a	0.04898
Innate Immunity	Function	3	0.0714286	5.45342	0.0162	hsa-mir-136,hsa-let-7d,hsa-mir-146a	0.0492231
