# Supplementary material for: Circulating microRNA Profiles Identify a Patient Subgroup with High Inflammation and Severe Symptoms in Schizophrenia Experiencing Acute Psychosis
Source: Int J Mol Sci. 2024 Apr 12;25(8):4291. doi: 10.3390/ijms25084291 (PMC11050142; doi:10.3390/ijms25084291)
Supplement: Supplementary file 1 [file ijms-25-04291-s001.zip › Supplementary Table S4_Mean and SD values of protein levels.xlsx]

## Sheet: all the 387 proteins
	CES1_CM	UMOD_CM	FGF-19_In	Siglec-9_NL	G-CSF_NL	BCAN_NL	THY 1_NL	NEFL_NE	CST5_In	IL-15RA_In	NT-3_In	RGMA_NL	FAP_CM	OSMR_CM	MDGA1_NL	LILRB1_CM	LILRB2_CM	MBL2_CM	DPP4_CM	AOC3_CM	NRP1_CM	PLA2G10_NE	COMP_CM	CPM_NL	REG1A_CM	CXCL9_In	EDA2R_NL	IL-12B_In	IL12_NL	ANG_CM	TRAIL_In	TRANCE_In	Alpha-2-MRAP_NL	FCN2_CM	SCARA5_NL	GRN_CV	CLEC10A_NL	OPN_CV	CPA2_NL	VWC2_NL	DRAXIN_NL	NBL1_NL	CADM3_NL	EPHB6_NL	MEPE_CV	CDH3_NL	DSG3_NE	PRTG_NL	ADAM 22_NL
mean values of protein levels in all the samples	3.11709	2.80887	8.81366	5.05362	4.05594	5.22368	10.0361	3.05406	6.40868	2.35042	3.10817	11.6314	5.1063	0.960535	4.72156	2.5655	3.8537	9.66965	4.85429	2.99795	1.24392	5.25121	8.05432	8.26134	6.8735	6.69739	4.10665	7.10171	8.02705	7.25976	7.97577	5.57534	8.98913	6.98993	8.94143	5.22709	5.7666	7.23407	9.57772	5.39854	3.69948	5.92313	3.52602	4.82845	5.11607	7.55568	5.72529	6.36792	5.16982
mean values of protein levels within subgroup 1	3.11582	2.89365	9.09495	5.02454	3.98489	5.11581	9.95381	2.79739	6.40679	2.36715	3.14453	11.6969	5.08585	0.922343	4.53812	2.51715	3.96009	9.31378	4.7722	2.86896	1.27509	4.95945	7.80349	8.13224	6.81896	6.50742	4.15667	7.16222	8.03154	7.31653	8.06483	5.83914	9.33762	6.84778	8.84953	5.07508	5.61845	7.242	9.51667	5.49075	3.6616	5.99962	3.80345	4.89043	5.27663	7.59202	5.62668	6.24037	5.10033
mean values of protein levels within subgroup 2	3.02273	2.70234	8.83498	5.11605	4.09706	5.19727	10.0733	3.02073	6.39506	2.37447	3.14622	11.6627	5.03531	0.962818	4.84948	2.67813	3.87894	9.46689	4.81328	2.90846	1.14989	5.40806	8.22256	8.2916	7.03488	6.86897	4.09594	7.2082	8.08509	7.40604	8.03999	5.57801	8.77997	7.0408	9.00332	5.40167	5.91099	7.47789	9.5943	5.53184	3.92611	5.9115	3.50752	4.9074	5.16897	7.69936	5.92792	6.49242	5.29562
mean values of protein levels within subgroup 3	3.18085	2.82337	8.61191	5.03137	4.07589	5.31321	10.0661	3.2474	6.41902	2.32324	3.05855	11.5668	5.16727	0.984474	4.75857	2.52264	3.76595	10.0421	4.93635	3.1436	1.28582	5.34115	8.10938	8.32723	6.80228	6.70964	4.08045	6.99037	7.98537	7.12439	7.87358	5.39768	8.89624	7.05079	8.96143	5.21204	5.76912	7.06623	9.60736	5.2482	3.57366	5.87989	3.35341	4.7345	4.97377	7.43566	5.65594	6.36996	5.13228
SD values of protein levels in all the samples	0.754879	0.225027	1.12612	0.518179	0.422999	0.307245	0.20696	0.533275	0.588895	0.255508	0.305831	0.242502	0.191077	0.198963	0.724736	0.239668	0.265808	1.70894	0.254695	0.354467	0.373255	0.583669	0.346794	0.337512	0.438153	0.597416	0.408075	0.508478	0.569518	0.409566	0.242431	0.514761	0.724896	0.552974	0.272475	0.319822	0.646889	0.366565	0.588969	0.506436	0.393144	0.0958088	0.426874	0.298734	0.375966	0.374026	0.470164	0.23934	0.447175
SD values of protein levels within subgroup 1	0.788673	0.224425	1.14869	0.598487	0.523115	0.307417	0.19725	0.423907	0.359504	0.320139	0.215842	0.270087	0.244426	0.254858	0.687041	0.24994	0.204121	2.04983	0.23606	0.28308	0.359334	0.687733	0.351297	0.407091	0.312393	0.576858	0.413709	0.672448	0.779802	0.439089	0.293835	0.574784	0.585374	0.73701	0.326801	0.337883	0.941906	0.40243	0.655271	0.600985	0.424531	0.0455042	0.353459	0.238487	0.275166	0.309188	0.363757	0.113009	0.477325
SD values of protein levels within subgroup 2	0.850871	0.0934472	0.967968	0.420822	0.386949	0.317517	0.228389	0.6144	0.732524	0.270325	0.412705	0.28953	0.147174	0.189024	0.648653	0.177215	0.145753	1.23671	0.276592	0.466466	0.379615	0.517851	0.302997	0.31203	0.296314	0.392583	0.280782	0.474895	0.501833	0.305356	0.262518	0.385998	0.197111	0.593181	0.214203	0.331757	0.525481	0.333967	0.257161	0.421769	0.433306	0.0990113	0.427449	0.363613	0.42085	0.400909	0.494008	0.292148	0.404322
SD values of protein levels within subgroup 3	0.756381	0.274804	1.28631	0.576725	0.420959	0.309279	0.207445	0.520019	0.671257	0.228054	0.305635	0.200987	0.179228	0.185193	0.846209	0.267572	0.345959	1.854	0.256206	0.292724	0.410116	0.545033	0.307126	0.319821	0.580176	0.733924	0.50728	0.444533	0.51858	0.448892	0.170607	0.524533	0.97038	0.428699	0.283766	0.274098	0.535708	0.29778	0.743993	0.509059	0.314659	0.0945227	0.414455	0.295699	0.388771	0.396051	0.523364	0.240936	0.488123
The suffix in protein names indicates the protein levels were measured using each Olink® Target panel (_CM: Olink® Target 96 Cardiometabolic, _CV: Olink® Target 96 Cardiovascular III, _In: Olink® Target 96 Inflammation, _Nl: Olink® Target 96 Neuro Exploratory, _NE: Olink® Target 96 Neurology and _Cy: Olink® Target 48 Cytokine).
[truncated: 338 more columns]
