# Supplementary material for: Circulating microRNA Profiles Identify a Patient Subgroup with High Inflammation and Severe Symptoms in Schizophrenia Experiencing Acute Psychosis
Source: Int J Mol Sci. 2024 Apr 12;25(8):4291. doi: 10.3390/ijms25084291 (PMC11050142; doi:10.3390/ijms25084291)
Supplement: Supplementary file 1 [file ijms-25-04291-s001.zip › Supplementary Table S5_Protein set enrichment results (without filtering).xlsx]

## Sheet: Upregulated protein subgroup1
Term	Category	Count	%	PValue	Genes (Entrez gene ID)	List Total	Pop Hits	Pop Total	Fold Enrichment	q
hsa04060:Cytokine-cytokine receptor interaction	KEGG_PATHWAY	6	17.6471	0.00184288	6373, 6372, 6352, 3574, 2919, 7040	27	297	8465	6.33371	0.0460961
hsa04061:Viral protein interaction with cytokine and cytokine receptor	KEGG_PATHWAY	4	11.7647	0.00341453	6373, 6372, 6352, 2919	27	100	8465	12.5407	0.0460961
hsa04062:Chemokine signaling pathway	KEGG_PATHWAY	4	11.7647	0.0203519	6373, 6372, 6352, 2919	27	192	8465	6.53164	0.183167
hsa04659:Th17 cell differentiation	KEGG_PATHWAY	3	8.82353	0.0429614	5534, 7040, 27040	27	108	8465	8.70885	0.255742
hsa04668:TNF signaling pathway	KEGG_PATHWAY	3	8.82353	0.0473596	6372, 6352, 2919	27	114	8465	8.25049	0.255742
hsa04213:Longevity regulating pathway - multiple species	KEGG_PATHWAY	2	5.88235	0.174211	84335, 6647	27	62	8465	10.1135	0.515673
hsa04146:Peroxisome	KEGG_PATHWAY	2	5.88235	0.223893	6647, 10654	27	82	8465	7.64679	0.515673
hsa04010:MAPK signaling pathway	KEGG_PATHWAY	3	8.82353	0.237032	5154, 5534, 7040	27	302	8465	3.11442	0.515673
hsa04658:Th1 and Th2 cell differentiation	KEGG_PATHWAY	2	5.88235	0.247643	5534, 27040	27	92	8465	6.81562	0.515673
hsa04657:IL-17 signaling pathway	KEGG_PATHWAY	2	5.88235	0.252309	6372, 2919	27	94	8465	6.67061	0.515673
hsa04660:T cell receptor signaling pathway	KEGG_PATHWAY	2	5.88235	0.275222	5534, 27040	27	104	8465	6.0292	0.515673
hsa04625:C-type lectin receptor signaling pathway	KEGG_PATHWAY	2	5.88235	0.275222	51266, 5534	27	104	8465	6.0292	0.515673
hsa04064:NF-kappa B signaling pathway	KEGG_PATHWAY	2	5.88235	0.275222	2919, 27040	27	104	8465	6.0292	0.515673
hsa04620:Toll-like receptor signaling pathway	KEGG_PATHWAY	2	5.88235	0.275222	6373, 6352	27	104	8465	6.0292	0.515673
hsa04151:PI3K-Akt signaling pathway	KEGG_PATHWAY	3	8.82353	0.296984	1975, 5154, 3574	27	354	8465	2.65694	0.515673
hsa04650:Natural killer cell mediated cytotoxicity	KEGG_PATHWAY	2	5.88235	0.325389	5534, 27040	27	127	8465	4.9373	0.515673
hsa04380:Osteoclast differentiation	KEGG_PATHWAY	2	5.88235	0.327492	5534, 7040	27	128	8465	4.89873	0.515673
hsa04218:Cellular senescence	KEGG_PATHWAY	2	5.88235	0.383897	5534, 7040	27	156	8465	4.01947	0.515673
hsa04150:mTOR signaling pathway	KEGG_PATHWAY	2	5.88235	0.383897	1975, 84335	27	156	8465	4.01947	0.515673
hsa04630:JAK-STAT signaling pathway	KEGG_PATHWAY	2	5.88235	0.402917	5154, 3574	27	166	8465	3.77733	0.515673
hsa04310:Wnt signaling pathway	KEGG_PATHWAY	2	5.88235	0.412214	284654, 5534	27	171	8465	3.66688	0.515673
hsa04360:Axon guidance	KEGG_PATHWAY	2	5.88235	0.43218	5365, 5534	27	182	8465	3.44526	0.515673
hsa04621:NOD-like receptor signaling pathway	KEGG_PATHWAY	2	5.88235	0.439277	6352, 2919	27	186	8465	3.37117	0.515673
hsa04015:Rap1 signaling pathway	KEGG_PATHWAY	2	5.88235	0.480102	5154, 27040	27	210	8465	2.98589	0.540115
hsa04014:Ras signaling pathway	KEGG_PATHWAY	2	5.88235	0.521102	5154, 27040	27	236	8465	2.65694	0.56279
hsa04020:Calcium signaling pathway	KEGG_PATHWAY	2	5.88235	0.546208	5154, 5534	27	253	8465	2.47841	0.567216
hsa01100:Metabolic pathways	KEGG_PATHWAY	3	8.82353	0.963671	22933, 2530, 10654	27	1541	8465	0.610354	0.963671

## Sheet: Upregulated protein subgroup2
Term	Category	Count	%	PValue	Genes (Entrez gene ID)	List Total	Pop Hits	Pop Total	Fold Enrichment	q
hsa04060:Cytokine-cytokine receptor interaction	KEGG_PATHWAY	8	36.3636	5.31627e-07	7132, 7133, 4055, 3554, 6347, 9518, 10673, 94	17	297	8465	13.4126	5.31627e-06
hsa04061:Viral protein interaction with cytokine and cytokine receptor	KEGG_PATHWAY	4	18.1818	0.000801157	7132, 7133, 4055, 6347	17	100	8465	19.9176	0.00293073
hsa04064:NF-kappa B signaling pathway	KEGG_PATHWAY	4	18.1818	0.000898092	7132, 4055, 3554, 10673	17	104	8465	19.1516	0.00293073
hsa04668:TNF signaling pathway	KEGG_PATHWAY	4	18.1818	0.00117229	7132, 7133, 6401, 6347	17	114	8465	17.4716	0.00293073
hsa04380:Osteoclast differentiation	KEGG_PATHWAY	3	13.6364	0.0237033	7132, 3554, 140885	17	128	8465	11.6705	0.0474066
hsa04672:Intestinal immune network for IgA production	KEGG_PATHWAY	2	9.09091	0.0887777	4055, 10673	17	49	8465	20.3241	0.147963
hsa04010:MAPK signaling pathway	KEGG_PATHWAY	3	13.6364	0.10965	7132, 3554, 26291	17	302	8465	4.94644	0.153555
hsa04920:Adipocytokine signaling pathway	KEGG_PATHWAY	2	9.09091	0.122844	7132, 7133	17	69	8465	14.4331	0.153555
hsa04933:AGE-RAGE signaling pathway in diabetic complications	KEGG_PATHWAY	2	9.09091	0.173296	6401, 6347	17	100	8465	9.95882	0.192551
hsa04151:PI3K-Akt signaling pathway	KEGG_PATHWAY	2	9.09091	0.495467	3371, 26291	17	354	8465	2.81323	0.495467

## Sheet: Downregulated protein subgroup3
Term	Category	Count	%	PValue	Genes (Entrez gene ID)	List Total	Pop Hits	Pop Total	Fold Enrichment	q
hsa04061:Viral protein interaction with cytokine and cytokine receptor	KEGG_PATHWAY	9	15.7895	1.97999e-08	6372, 6352, 6374, 6357, 3576, 8764, 2919, 6358, 3606	42	100	8465	18.1393	8.90997e-07
hsa04060:Cytokine-cytokine receptor interaction	KEGG_PATHWAY	12	21.0526	1.0181e-07	3604, 6372, 6352, 6374, 6357, 3576, 8764, 3574, 2919, 6358, 7040, 3606	42	297	8465	8.14334	2.29074e-06
hsa04657:IL-17 signaling pathway	KEGG_PATHWAY	7	12.2807	5.2481e-06	6372, 6374, 841, 3576, 2919, 4312, 836	42	94	8465	15.0089	7.87214e-05
hsa04668:TNF signaling pathway	KEGG_PATHWAY	7	12.2807	1.60079e-05	6372, 6352, 6374, 841, 6401, 2919, 836	42	114	8465	12.3757	0.000180089
hsa04062:Chemokine signaling pathway	KEGG_PATHWAY	7	12.2807	0.00029226	6372, 6352, 6374, 6357, 3576, 2919, 6358	42	192	8465	7.34809	0.00263034
hsa04933:AGE-RAGE signaling pathway in diabetic complications	KEGG_PATHWAY	5	8.77193	0.00132792	5054, 6401, 3576, 836, 7040	42	100	8465	10.0774	0.00995938
hsa04623:Cytosolic DNA-sensing pathway	KEGG_PATHWAY	4	7.01754	0.00559329	6352, 841, 836, 3606	42	75	8465	10.7492	0.0359569
hsa04218:Cellular senescence	KEGG_PATHWAY	5	8.77193	0.00661595	5054, 3576, 5534, 7040, 1978	42	156	8465	6.45986	0.0372147
hsa04621:NOD-like receptor signaling pathway	KEGG_PATHWAY	5	8.77193	0.0121253	6352, 841, 3576, 2919, 3606	42	186	8465	5.41795	0.0606264
hsa04064:NF-kappa B signaling pathway	KEGG_PATHWAY	4	7.01754	0.0136947	6357, 3576, 2919, 27040	42	104	8465	7.75183	0.0616261
hsa04650:Natural killer cell mediated cytotoxicity	KEGG_PATHWAY	4	7.01754	0.0232283	5534, 836, 3384, 27040	42	127	8465	6.34796	0.0950248
hsa04936:Alcoholic liver disease	KEGG_PATHWAY	4	7.01754	0.0309755	841, 3576, 2919, 836	42	142	8465	5.6774	0.116158
hsa04932:Non-alcoholic fatty liver disease	KEGG_PATHWAY	4	7.01754	0.0386628	841, 3576, 836, 7040	42	155	8465	5.20123	0.133833
hsa04115:p53 signaling pathway	KEGG_PATHWAY	3	5.26316	0.049659	5054, 841, 836	42	74	8465	8.17085	0.159618
hsa04010:MAPK signaling pathway	KEGG_PATHWAY	5	8.77193	0.0572136	5154, 5534, 836, 7040, 1945	42	302	8465	3.33688	0.171641
hsa04625:C-type lectin receptor signaling pathway	KEGG_PATHWAY	3	5.26316	0.0900146	841, 51266, 5534	42	104	8465	5.81387	0.226748
hsa04620:Toll-like receptor signaling pathway	KEGG_PATHWAY	3	5.26316	0.0900146	6352, 841, 3576	42	104	8465	5.81387	0.226748
hsa04151:PI3K-Akt signaling pathway	KEGG_PATHWAY	5	8.77193	0.0906992	1975, 5154, 3574, 1945, 1978	42	354	8465	2.84672	0.226748
hsa04659:Th17 cell differentiation	KEGG_PATHWAY	3	5.26316	0.0959577	5534, 7040, 27040	42	108	8465	5.59854	0.227268
hsa04215:Apoptosis - multiple species	KEGG_PATHWAY	2	3.50877	0.144144	841, 836	42	32	8465	12.5967	0.324325
hsa04150:mTOR signaling pathway	KEGG_PATHWAY	3	5.26316	0.174285	1975, 84335, 1978	42	156	8465	3.87592	0.344384
hsa04514:Cell adhesion molecules	KEGG_PATHWAY	3	5.26316	0.176018	6401, 6403, 3384	42	157	8465	3.85123	0.344384
hsa04390:Hippo signaling pathway	KEGG_PATHWAY	3	5.26316	0.176018	5054, 8312, 7040	42	157	8465	3.85123	0.344384
hsa04310:Wnt signaling pathway	KEGG_PATHWAY	3	5.26316	0.200567	8312, 284654, 5534	42	171	8465	3.53592	0.376063
hsa04213:Longevity regulating pathway - multiple species	KEGG_PATHWAY	2	3.50877	0.260749	84335, 6647	42	62	8465	6.50154	0.468338
hsa04015:Rap1 signaling pathway	KEGG_PATHWAY	3	5.26316	0.270595	5154, 27040, 1945	42	210	8465	2.87925	0.468338
hsa04622:RIG-I-like receptor signaling pathway	KEGG_PATHWAY	2	3.50877	0.2926	841, 3576	42	71	8465	5.6774	0.478618
hsa01524:Platinum drug resistance	KEGG_PATHWAY	2	3.50877	0.299494	841, 836	42	73	8465	5.52185	0.478618
hsa04014:Ras signaling pathway	KEGG_PATHWAY	3	5.26316	0.317526	5154, 27040, 1945	42	236	8465	2.56205	0.478618
hsa01521:EGFR tyrosine kinase inhibitor resistance	KEGG_PATHWAY	2	3.50877	0.319785	5154, 1978	42	79	8465	5.10247	0.478618
hsa04146:Peroxisome	KEGG_PATHWAY	2	3.50877	0.329715	6647, 10654	42	82	8465	4.9158	0.478618
hsa04211:Longevity regulating pathway	KEGG_PATHWAY	2	3.50877	0.352336	84335, 1978	42	89	8465	4.52916	0.493366
hsa04658:Th1 and Th2 cell differentiation	KEGG_PATHWAY	2	3.50877	0.361802	5534, 27040	42	92	8465	4.38147	0.493366
hsa04660:T cell receptor signaling pathway	KEGG_PATHWAY	2	3.50877	0.398332	5534, 27040	42	104	8465	3.87592	0.527204
hsa04066:HIF-1 signaling pathway	KEGG_PATHWAY	2	3.50877	0.412944	5054, 1978	42	109	8465	3.69812	0.530928
hsa04152:AMPK signaling pathway	KEGG_PATHWAY	2	3.50877	0.446613	84335, 1978	42	121	8465	3.33137	0.549663
hsa04380:Osteoclast differentiation	KEGG_PATHWAY	2	3.50877	0.465376	5534, 7040	42	128	8465	3.14918	0.549663
hsa04926:Relaxin signaling pathway	KEGG_PATHWAY	2	3.50877	0.468005	4312, 7040	42	129	8465	3.12477	0.549663
hsa04210:Apoptosis	KEGG_PATHWAY	2	3.50877	0.48606	841, 836	42	136	8465	2.96394	0.549663
hsa04910:Insulin signaling pathway	KEGG_PATHWAY	2	3.50877	0.48859	5770, 1978	42	137	8465	2.9423	0.549663
hsa04072:Phospholipase D signaling pathway	KEGG_PATHWAY	2	3.50877	0.515629	5154, 3576	42	148	8465	2.72362	0.565934
hsa04630:JAK-STAT signaling pathway	KEGG_PATHWAY	2	3.50877	0.556895	5154, 3574	42	166	8465	2.42828	0.596673
hsa04360:Axon guidance	KEGG_PATHWAY	2	3.50877	0.590682	5534, 1945	42	182	8465	2.21481	0.618155
hsa04020:Calcium signaling pathway	KEGG_PATHWAY	2	3.50877	0.712657	5154, 5534	42	253	8465	1.59326	0.728854
hsa01100:Metabolic pathways	KEGG_PATHWAY	3	5.26316	0.997369	100, 22933, 10654	42	1541	8465	0.39237	0.997369
