# Supplementary material for: Circulating microRNA Profiles Identify a Patient Subgroup with High Inflammation and Severe Symptoms in Schizophrenia Experiencing Acute Psychosis
Source: Int J Mol Sci. 2024 Apr 12;25(8):4291. doi: 10.3390/ijms25084291 (PMC11050142; doi:10.3390/ijms25084291)
Supplement: Supplementary file 1 [file ijms-25-04291-s001.zip › Supplementary Table S6_Correlation coefficients between individual proteins and PANSS scores.xlsx]

## Sheet: PANSS_total
Protein names	Pearson's correlation coefficients	p values	Benjamini–Hochberg corrected p values		The suffix in protein names indicates the protein levels were measured using each Olink® Target panel (_CM: Olink® Target 96 Cardiometabolic, _CV: Olink® Target 96 Cardiovascular III, _In: Olink® Target 96 Inflammation, _Nl: Olink® Target 96 Neuro Exploratory, _NE: Olink® Target 96 Neurology and _Cy: Olink® Target 48 Cytokine).
Ep-CAM_CV	0.565794	0.00750939	0.740566
Notch 3_CV	0.541725	0.0111959	0.865219
PAM_CM	0.522079	0.0151956	0.933481
IL2-RA_CV	0.507772	0.0187784	0.964436
VCAM1_CM	0.500227	0.0209242	0.975291
CHI3L1_CV	0.452886	0.0392425	0.999056
GDF-15_CV	0.44903	0.0411587	0.999305
TNFSF13B_CV	0.448294	0.0415327	0.999322
MCP-1_CV	0.441797	0.0449488	0.999616
SHPS-1_CV	0.422009	0.0567036	0.999951
ANGPTL3_CM	0.42035	0.057787	0.999957
OPG_CV	0.418006	0.0593435	0.999966
IGLC2_CM	0.416835	0.0601332	0.999968
TIMD4_CM	0.413229	0.0626151	0.999978
IL-18BP_CV	0.413135	0.0626805	0.999978
vWF_CV	0.408027	0.0663313	0.999987
FCGR3B_CM	0.392753	0.0782086	0.999998
PCOLCE_CM	0.372279	0.0965341	1
CTSD_CV	0.366879	0.101854	1
CPB1_CV	0.358686	0.110329	1
LILRB5_CM	0.353579	0.115864	1
Gal-4_CV	0.353015	0.116487	1
ICAM3_CM	0.346267	0.124133	1
TNC_CM	0.341313	0.129971	1
CCL14_CM	0.341248	0.13005	1
CPA1_CV	0.340208	0.1313	1
OPN_CV	0.337964	0.134027	1
PLC_CV	0.316527	0.162131	1
GAS6_CM	0.316477	0.162201	1
ICAM-2_CV	0.313872	0.165875	1
SELL_CM	0.305379	0.178254	1
PCSK9_CV	0.30267	0.182331	1
PRTN3_CV	0.298074	0.189393	1
PRSS2_CM	0.296193	0.192336	1
COL1A1_CV	0.295691	0.193127	1
UMOD_CM	-0.29496	0.194282	1
PON3_CV	0.293832	0.196074	1
PI3_CV	0.289958	0.202312	1
TLT-2_CV	0.286025	0.208779	1
TNF-R2_CV	0.284885	0.210679	1
ITGB2_CV	0.283821	0.212462	1
CD93_CV	0.282418	0.214829	1
CA1_CM	-0.279483	0.219837	1
IGFBP-2_CV	0.278422	0.221666	1
DPP4_CM	-0.277416	0.22341	1
QPCT_CM	0.271241	0.23431	1
CD163_CV	0.270567	0.235521	1
IGFBP6_CM	-0.268368	0.239498	1
NRP1_CM	-0.264706	0.246217	1
SELE_CV	0.264293	0.246982	1
AOC3_CM	-0.263715	0.248055	1
MMP-2_CV	0.2636	0.248269	1
CST3_CM	0.263238	0.248943	1
RETN_CV	0.262588	0.250157	1
FAS_CV	0.262462	0.250394	1
ST2_CV	-0.259673	0.255647	1
TR_CV	0.251895	0.270667	1
AP-N_CV	-0.251145	0.272144	1
TCN2_CM	-0.247827	0.27874	1
FCN2_CM	0.246723	0.280957	1
PAI_CV	0.243572	0.287343	1
AXL_CV	0.241563	0.29146	1
GRN_CV	0.239175	0.296404	1
TNF-R1_CV	0.235986	0.303083	1
LYVE1_CM	0.235847	0.303378	1
LDL receptor_CV	0.233087	0.309236	1
CTSZ_CV	0.222319	0.332743	1
CDH1_CM	0.216275	0.346388	1
PGLYRP1_CV	-0.212151	0.355883	1
FETUB_CM	0.206577	0.368955	1
MMP-3_CV	-0.203879	0.375377	1
VASN_CM	-0.203788	0.375595	1
CHIT1_CV	-0.200345	0.383888	1
F11_CM	-0.193575	0.400488	1
EPHB4_CV	0.190314	0.408624	1
FAP_CM	-0.19012	0.40911	1
CCL18_CM	-0.189989	0.409439	1
IL-1RT1_CV	0.189705	0.410154	1
LILRB1_CM	0.185755	0.420148	1
ALCAM_CV	0.182662	0.428064	1
IGFBP3_CM	0.180247	0.4343	1
TNFRSF14_CV	0.180031	0.434862	1
TIMP4_CV	0.178994	0.437555	1
uPA_CV	0.176531	0.443991	1
PROC_CM	0.174618	0.449023	1
ICAM1_CM	-0.173013	0.453266	1
U-PAR_CV	0.17251	0.454601	1
LTBR_CV	0.167875	0.466994	1
NT-proBNP_CV	0.166202	0.471509	1
THBS4_CM	0.164478	0.476184	1
IGFBP-7_CV	0.162678	0.481091	1
REG1A_CM	0.16143	0.484507	1
MET_CM	-0.159983	0.488483	1
IL-1RT2_CV	0.154253	0.504384	1
JAM-A_CV	0.153206	0.507318	1
TGFBR3_CM	0.152711	0.508708	1
REG3A_CM	-0.1478	0.522589	1
MPO_CV	0.147539	0.523334	1
TFF3_CV	0.144954	0.530716	1
C1QTNF1_CM	-0.144412	0.532271	1
EGFR_CV	0.143591	0.534628	1
FABP4_CV	0.142826	0.53683	1
BLM hydrolase_CV	0.137518	0.552223	1
PDGF subunit A_CV	0.13068	0.572338	1
MMP-9_CV	-0.130075	0.574133	1
AZU1_CV	-0.129951	0.5745	1
SELP_CV	0.123524	0.593726	1
RARRES2_CV	0.121792	0.59895	1
EFEMP1_CM	0.121741	0.599105	1
t-PA_CV	-0.120255	0.603605	1
ENG_CM	-0.119438	0.606085	1
NOTCH1_CM	-0.118777	0.608094	1
CSTB_CV	-0.117446	0.612149	1
DLK-1_CV	0.116435	0.615235	1
CR2_CM	-0.112773	0.626469	1
IL-6RA_CV	0.109205	0.637489	1
CASP-3_CV	0.10603	0.647361	1
C2_CM	-0.104863	0.651004	1
TIE1_CM	0.102154	0.659488	1
CHL1_CM	-0.100863	0.663546	1
KLK6_CV	-0.100137	0.665834	1
CXCL16_CV	0.0992721	0.668559	1
ST6GAL1_CM	0.0965431	0.67719	1
APOM_CM	-0.0947331	0.682936	1
KIT_CM	-0.0907951	0.695496	1
PSP-D_CV	0.0891509	0.700763	1
CNTN1_CV	0.088786	0.701933	1
SERPINA5_CM	-0.0870902	0.707382	1
SOD1_CM	-0.0866796	0.708704	1
PLXNB2_CM	-0.0865412	0.709149	1
CCL24_CV	0.086484	0.709334	1
FCGR2A_CM	0.0854589	0.712637	1
MB_CV	0.0832023	0.719927	1
SERPINA7_CM	-0.0823474	0.722695	1
GNLY_CM	-0.0805128	0.728646	1
CCL15_CV	0.0799744	0.730395	1
MEGF9_CM	-0.0775375	0.738329	1
CDH5_CV	0.0673533	0.771754	1
DEFA1_CM	0.0655187	0.777819	1
CNDP1_CM	0.0648322	0.780091	1
MFAP5_CM	-0.0642647	0.781971	1
SPON1_CV	0.0634562	0.784652	1
ANG_CM	0.0611996	0.792146	1
CRTAC1_CM	0.0602081	0.795444	1
Gal-3_CV	0.0575387	0.80434	1
PTPRS_CM	-0.0571181	0.805744	1
TFPI_CV	0.0569079	0.806446	1
CES1_CM	0.054589	0.814197	1
CA4_CM	-0.0531674	0.818958	1
TR-AP_CV	-0.0529444	0.819705	1
SCGB3A2_CV	-0.0485386	0.8345	1
TNFRSF10C_CV	-0.0453677	0.845181	1
LCN2_CM	0.0436101	0.851113	1
COL18A1_CM	-0.0407246	0.860869	1
PLTP_CM	0.0329913	0.887107	1
IGFBP-1_CV	0.0327966	0.887769	1
CCL5_CM	0.0312741	0.89295	1
MBL2_CM	0.0311956	0.893217	1
GP6_CV	0.0302562	0.896416	1
OSMR_CM	0.0298775	0.897706	1
IL7R_CM	-0.028925	0.900951	1
SAA4_CM	0.0283563	0.90289	1
IL-17RA_CV	0.0273728	0.906243	1
TGFBI_CM	-0.0253865	0.913021	1
TIMP1_CM	0.0244491	0.916222	1
LILRB2_CM	0.0228191	0.92179	1
SPARCL1_CM	-0.0190862	0.934555	1
PRCP_CM	0.0181828	0.937647	1
CD59_CM	0.0174759	0.940067	1
CFHR5_CM	0.0170602	0.94149	1
CD46_CM	0.0161845	0.944488	1
CA3_CM	0.0155957	0.946505	1
NID1_CM	0.00637865	0.978108	1
TNXB_CM	0.00560173	0.980774	1
GP1BA_CM	0.00510966	0.982463	1
COMP_CM	0.00400872	0.986241	1
F7_CM	0.00334664	0.988513	1
PLA2G7_CM	0.00235521	0.991916	1
NCAM1_CM	-0.000140308	0.999518	1

## Sheet: PANSS_positive symptom
Protein names	Pearson's correlation coefficients	p values	Benjamini–Hochberg corrected p values		The suffix in protein names indicates the protein levels were measured using each Olink® Target panel (_CM: Olink® Target 96 Cardiometabolic, _CV: Olink® Target 96 Cardiovascular III, _In: Olink® Target 96 Inflammation, _Nl: Olink® Target 96 Neuro Exploratory, _NE: Olink® Target 96 Neurology and _Cy: Olink® Target 48 Cytokine).
MCP-1_CV	0.580693	0.00577687	0.645504
SELE_CV	0.514076	0.0171244	0.953789
ICAM-2_CV	0.509554	0.0182982	0.961947
IGLC2_CM	0.508238	0.0186518	0.96362
FCGR3B_CM	0.463141	0.0344831	0.997847
CA1_CM	-0.462247	0.034879	0.997924
FAS_CV	0.457099	0.0372288	0.998589
JAM-A_CV	0.454476	0.0384728	0.998827
PDGF subunit A_CV	0.446527	0.042441	0.999398
CCL14_CM	0.432126	0.0504317	0.999849
TIMD4_CM	0.414466	0.0617551	0.999979
GDF-15_CV	0.410772	0.0643504	0.999986
SELP_CV	0.402171	0.0707122	0.999995
OPN_CV	0.401669	0.0710977	0.999995
TFF3_CV	0.401062	0.0715653	0.999995
FABP4_CV	0.399782	0.0725599	0.999996
CASP-3_CV	0.398676	0.0734282	0.999996
TLT-2_CV	0.395709	0.0757946	0.999997
DPP4_CM	-0.393972	0.0772062	0.999998
OPG_CV	0.383628	0.0860245	0.999999
GP6_CV	0.380385	0.0889363	1
NRP1_CM	-0.369199	0.0995433	1
VASN_CM	-0.363304	0.105492	1
FCN2_CM	0.354626	0.114714	1
PAI_CV	0.353684	0.115749	1
PCSK9_CV	0.344465	0.126235	1
CCL5_CM	0.343226	0.127694	1
IL2-RA_CV	0.340006	0.131544	1
PLC_CV	0.33201	0.141458	1
RARRES2_CV	0.327844	0.146827	1
PI3_CV	0.325476	0.149942	1
ITGB2_CV	0.323378	0.15274	1
CHI3L1_CV	0.323333	0.152801	1
AXL_CV	0.31613	0.162688	1
CPB1_CV	0.314011	0.165678	1
TNFRSF14_CV	0.30846	0.173692	1
CST3_CM	0.307907	0.174506	1
Notch 3_CV	0.301035	0.184823	1
IL-18BP_CV	0.298615	0.188553	1
CTSD_CV	0.289715	0.202708	1
BLM hydrolase_CV	0.289049	0.203794	1
TNF-R1_CV	0.288255	0.205095	1
TNFSF13B_CV	0.282595	0.214529	1
ST2_CV	-0.274942	0.227737	1
AOC3_CM	-0.274351	0.228777	1
CPA1_CV	0.271284	0.234234	1
PAM_CM	0.257474	0.259838	1
LILRB5_CM	0.257399	0.259982	1
IGFBP6_CM	-0.253051	0.268401	1
AP-N_CV	-0.251131	0.272172	1
MEGF9_CM	-0.250694	0.273035	1
EPHB4_CV	0.250636	0.273149	1
NOTCH1_CM	-0.250133	0.274146	1
IGFBP-7_CV	0.2501	0.274211	1
Gal-3_CV	0.248314	0.277766	1
ICAM1_CM	-0.24769	0.279015	1
UMOD_CM	-0.245587	0.283248	1
Gal-4_CV	0.242153	0.290247	1
PCOLCE_CM	0.233113	0.309179	1
ANG_CM	0.227714	0.320836	1
vWF_CV	0.225453	0.325794	1
Ep-CAM_CV	0.220039	0.337852	1
U-PAR_CV	0.215057	0.349178	1
LDL receptor_CV	0.214491	0.350478	1
PTPRS_CM	-0.210796	0.359035	1
FAP_CM	-0.204684	0.373454	1
NCAM1_CM	-0.201357	0.381441	1
CTSZ_CV	0.194423	0.398387	1
MB_CV	0.193029	0.401845	1
CCL24_CV	0.191001	0.406904	1
MPO_CV	0.19005	0.409286	1
MET_CM	-0.189362	0.411016	1
CNDP1_CM	-0.188949	0.412056	1
TNF-R2_CV	0.188359	0.413544	1
CA4_CM	-0.188256	0.413803	1
MMP-2_CV	0.187529	0.415643	1
CHIT1_CV	0.186643	0.41789	1
TR_CV	0.183972	0.424703	1
C1QTNF1_CM	-0.18232	0.428946	1
SERPINA7_CM	-0.180892	0.43263	1
TIMP4_CV	0.180554	0.433504	1
CCL18_CM	0.178277	0.439422	1
ANGPTL3_CM	0.176303	0.444589	1
ICAM3_CM	0.175927	0.445577	1
CDH1_CM	0.174399	0.4496	1
CD93_CV	0.173372	0.452315	1
RETN_CV	0.172047	0.455831	1
FCGR2A_CM	0.171351	0.457682	1
IL-17RA_CV	-0.165061	0.474601	1
TIMP1_CM	0.164095	0.477226	1
PON3_CV	0.163184	0.479708	1
LILRB1_CM	0.160977	0.485749	1
TFPI_CV	0.160455	0.487184	1
QPCT_CM	0.160335	0.487512	1
MFAP5_CM	-0.15854	0.492463	1
FETUB_CM	0.158314	0.493089	1
CSTB_CV	0.157964	0.494058	1
IGFBP-2_CV	0.146991	0.524895	1
KIT_CM	-0.146988	0.524903	1
CD59_CM	0.144713	0.531408	1
PLTP_CM	-0.144486	0.532057	1
AZU1_CV	-0.144244	0.532752	1
TCN2_CM	-0.143409	0.535151	1
VCAM1_CM	0.143296	0.535479	1
SOD1_CM	0.141897	0.53951	1
REG3A_CM	-0.141599	0.54037	1
COL1A1_CV	0.141379	0.541006	1
SERPINA5_CM	-0.140899	0.542394	1
TGFBR3_CM	-0.137597	0.551991	1
ST6GAL1_CM	0.134087	0.562274	1
CRTAC1_CM	0.133403	0.564289	1
CHL1_CM	-0.127029	0.583208	1
IL-6RA_CV	0.12678	0.583951	1
SCGB3A2_CV	-0.120439	0.603047	1
LTBR_CV	0.116457	0.615168	1
TNXB_CM	-0.115844	0.617042	1
SPON1_CV	-0.115496	0.618107	1
ALCAM_CV	0.113937	0.62289	1
KLK6_CV	-0.11357	0.624015	1
NT-proBNP_CV	0.110718	0.632808	1
PRTN3_CV	0.105588	0.648739	1
TGFBI_CM	-0.104446	0.652308	1
CES1_CM	0.103982	0.653759	1
uPA_CV	0.103779	0.654395	1
CD163_CV	0.103426	0.655501	1
IGFBP-1_CV	-0.100995	0.663131	1
IL-1RT1_CV	0.100722	0.66399	1
F11_CM	-0.0971309	0.675328	1
ENG_CM	-0.0957733	0.679632	1
EGFR_CV	0.0912437	0.694061	1
EFEMP1_CM	0.0872904	0.706738	1
CDH5_CV	0.0863859	0.70965	1
PRCP_CM	-0.0859866	0.710936	1
F7_CM	-0.0839875	0.717388	1
DLK-1_CV	0.0826669	0.72166	1
TNC_CM	0.0804301	0.728914	1
REG1A_CM	0.0792779	0.73266	1
PGLYRP1_CV	-0.0774163	0.738724	1
CD46_CM	0.0763363	0.742249	1
NID1_CM	0.0709342	0.759954	1
THBS4_CM	-0.0699382	0.763231	1
GP1BA_CM	0.0699263	0.76327	1
TR-AP_CV	0.0659109	0.776521	1
OSMR_CM	-0.0647083	0.780502	1
TNFRSF10C_CV	-0.0622052	0.788804	1
CA3_CM	-0.0605846	0.794191	1
TIE1_CM	0.0579832	0.802857	1
MBL2_CM	0.0550311	0.812718	1
COL18A1_CM	-0.0549473	0.812998	1
LILRB2_CM	0.0537658	0.816953	1
IL-1RT2_CV	0.0534446	0.818029	1
CCL15_CV	0.0491935	0.832297	1
GRN_CV	0.0491306	0.832508	1
IL7R_CM	-0.0490377	0.832821	1
SHPS-1_CV	0.0427978	0.853857	1
CFHR5_CM	-0.0416802	0.857636	1
COMP_CM	-0.0405614	0.861421	1
CXCL16_CV	0.0390053	0.866691	1
APOM_CM	0.0382406	0.869283	1
MMP-3_CV	-0.03676	0.874305	1
GNLY_CM	-0.0362161	0.87615	1
PRSS2_CM	0.0350712	0.880038	1
C2_CM	0.0350326	0.880169	1
PLXNB2_CM	-0.0319904	0.890512	1
PROC_CM	-0.0292942	0.899693	1
DEFA1_CM	0.0288483	0.901213	1
PLA2G7_CM	0.028273	0.903174	1
PSP-D_CV	0.0280627	0.903891	1
LYVE1_CM	-0.0276338	0.905353	1
LCN2_CM	-0.0216557	0.925766	1
CR2_CM	0.0200856	0.931136	1
IGFBP3_CM	0.0170694	0.941458	1
SPARCL1_CM	0.0169089	0.942008	1
MMP-9_CV	-0.0168274	0.942287	1
SELL_CM	-0.0160037	0.945108	1
t-PA_CV	0.0115327	0.96043	1
CNTN1_CV	-0.00551748	0.981063	1
SAA4_CM	0.00463431	0.984094	1
GAS6_CM	-0.000864732	0.997032	1

## Sheet: PANSS_negative symptom
Protein names	Pearson's correlation coefficients	p values	Benjamini–Hochberg corrected p values		The suffix in protein names indicates the protein levels were measured using each Olink® Target panel (_CM: Olink® Target 96 Cardiometabolic, _CV: Olink® Target 96 Cardiovascular III, _In: Olink® Target 96 Inflammation, _Nl: Olink® Target 96 Neuro Exploratory, _NE: Olink® Target 96 Neurology and _Cy: Olink® Target 48 Cytokine).
SHPS-1_CV	0.564991	0.0076138	0.745406
TGFBR3_CM	0.540136	0.0114836	0.872024
ANGPTL3_CM	0.512707	0.0174731	0.955846
PRSS2_CM	0.424573	0.0550609	0.999953
VCAM1_CM	0.414072	0.0620279	0.999986
PROC_CM	0.413286	0.0625755	0.999987
Ep-CAM_CV	0.409764	0.0650727	0.999991
CHI3L1_CV	0.400023	0.0723724	0.999998
GP6_CV	-0.392888	0.0780974	0.999999
CHIT1_CV	-0.386388	0.0836018	1
PCOLCE_CM	0.381658	0.0877843	1
CCL5_CM	-0.364016	0.104759	1
PRTN3_CV	0.359251	0.109729	1
PDGF subunit A_CV	-0.35277	0.116758	1
LYVE1_CM	0.349984	0.119879	1
PAM_CM	0.345229	0.125341	1
GAS6_CM	0.34236	0.128722	1
CPA1_CV	0.339345	0.132344	1
THBS4_CM	0.332834	0.140412	1
CCL18_CM	-0.33148	0.142133	1
SOD1_CM	-0.323118	0.15309	1
Notch 3_CV	0.32155	0.155208	1
IL-1RT2_CV	0.304007	0.180311	1
COL1A1_CV	0.300716	0.185311	1
vWF_CV	0.295674	0.193153	1
RETN_CV	0.283488	0.213022	1
PON3_CV	0.279078	0.220534	1
CD93_CV	0.278656	0.221262	1
CD163_CV	0.277784	0.222771	1
IL2-RA_CV	0.272837	0.23146	1
TNF-R2_CV	0.272816	0.231498	1
CASP-3_CV	-0.26795	0.240258	1
CXCL16_CV	0.264288	0.246991	1
IL-1RT1_CV	0.26388	0.247749	1
NT-proBNP_CV	0.261704	0.251814	1
TCN2_CM	-0.25625	0.26219	1
TNFSF13B_CV	0.255815	0.263029	1
CDH1_CM	0.252859	0.268776	1
CD59_CM	-0.251958	0.270544	1
CR2_CM	-0.251178	0.27208	1
CPB1_CV	0.249874	0.274659	1
GP1BA_CM	-0.245646	0.28313	1
UMOD_CM	-0.244971	0.284496	1
Gal-4_CV	0.242883	0.288752	1
MB_CV	-0.24191	0.290747	1
SELL_CM	0.24058	0.29349	1
ENG_CM	-0.238855	0.297069	1
IL-18BP_CV	0.234945	0.305285	1
FETUB_CM	0.229513	0.316923	1
CSTB_CV	-0.229407	0.317154	1
VASN_CM	0.225362	0.325995	1
MEGF9_CM	0.220502	0.33681	1
CD46_CM	-0.216926	0.344902	1
TNC_CM	0.215397	0.348396	1
SELP_CV	-0.213385	0.353026	1
GRN_CV	0.212931	0.354077	1
IGFBP-2_CV	0.2089	0.363474	1
TIMP1_CM	-0.206289	0.369637	1
TIMP4_CV	0.204147	0.374738	1
JAM-A_CV	-0.203152	0.377121	1
GDF-15_CV	0.201942	0.380029	1
SPON1_CV	0.19948	0.385986	1
CFHR5_CM	0.198241	0.389004	1
NCAM1_CM	0.193262	0.401265	1
ANG_CM	-0.192847	0.402297	1
OPG_CV	0.192105	0.404144	1
PI3_CV	0.190047	0.409293	1
ICAM3_CM	0.188814	0.412395	1
MMP-2_CV	0.187252	0.416343	1
LDL receptor_CV	0.186493	0.41827	1
TNFRSF10C_CV	0.185928	0.419706	1
PLXNB2_CM	-0.185618	0.420497	1
LTBR_CV	0.184341	0.423758	1
PLC_CV	0.182905	0.427438	1
PRCP_CM	0.173686	0.451484	1
REG3A_CM	-0.172821	0.453777	1
uPA_CV	0.172225	0.455358	1
SAA4_CM	0.171324	0.457756	1
F7_CM	0.171159	0.458196	1
CRTAC1_CM	-0.170564	0.459784	1
PCSK9_CV	0.170194	0.460771	1
CCL24_CV	-0.168461	0.465416	1
F11_CM	-0.168396	0.465591	1
OPN_CV	0.16579	0.472623	1
APOM_CM	-0.163948	0.477626	1
LILRB1_CM	0.162846	0.480631	1
ALCAM_CV	0.161904	0.483207	1
U-PAR_CV	0.154421	0.503914	1
TFF3_CV	-0.154042	0.504975	1
DLK-1_CV	0.153589	0.506243	1
CHL1_CM	-0.151541	0.511998	1
TNF-R1_CV	0.149067	0.518992	1
IL-6RA_CV	-0.144782	0.53121	1
TIMD4_CM	0.142361	0.538172	1
MPO_CV	0.1422	0.538635	1
SCGB3A2_CV	0.1412	0.541525	1
CTSZ_CV	0.140104	0.544698	1
CTSD_CV	0.140079	0.54477	1
FCGR3B_CM	0.137249	0.553007	1
EPHB4_CV	0.136991	0.55376	1
LILRB5_CM	0.13611	0.556339	1
MMP-3_CV	-0.134339	0.561534	1
PLA2G7_CM	-0.132446	0.567113	1
TIE1_CM	0.125789	0.586918	1
KLK6_CV	0.125546	0.587647	1
IGFBP-7_CV	-0.124476	0.590859	1
CA1_CM	0.124352	0.591233	1
C1QTNF1_CM	-0.123903	0.592583	1
LCN2_CM	0.123402	0.594091	1
SERPINA7_CM	0.122108	0.597995	1
NID1_CM	-0.121589	0.599565	1
PAI_CV	-0.120387	0.603204	1
IL-17RA_CV	0.119575	0.605669	1
COL18A1_CM	-0.119371	0.606289	1
TR-AP_CV	0.116372	0.615427	1
MMP-9_CV	-0.115636	0.61768	1
CNDP1_CM	0.115062	0.619438	1
MCP-1_CV	0.114898	0.61994	1
QPCT_CM	0.114138	0.622271	1
TLT-2_CV	-0.110642	0.633042	1
CA3_CM	-0.110388	0.633828	1
IL7R_CM	0.109796	0.63566	1
C2_CM	0.103915	0.653969	1
EFEMP1_CM	0.100418	0.664949	1
BLM hydrolase_CV	-0.0949763	0.682163	1
COMP_CM	0.0928836	0.688825	1
CCL15_CV	0.0917268	0.692517	1
ITGB2_CV	0.091557	0.69306	1
TR_CV	0.0907873	0.695521	1
Gal-3_CV	-0.0891196	0.700863	1
PGLYRP1_CV	-0.0882484	0.703659	1
GNLY_CM	-0.0858724	0.711304	1
t-PA_CV	-0.0844143	0.716009	1
ICAM1_CM	0.0843815	0.716115	1
LILRB2_CM	0.0841787	0.71677	1
FAP_CM	-0.0825456	0.722053	1
FCGR2A_CM	-0.082322	0.722777	1
NRP1_CM	-0.0822818	0.722907	1
ST2_CV	-0.0818427	0.724331	1
CST3_CM	0.0815968	0.725128	1
IGFBP3_CM	0.0781081	0.736469	1
KIT_CM	-0.0734759	0.751608	1
PLTP_CM	0.0723029	0.755457	1
RARRES2_CV	-0.0707083	0.760696	1
AP-N_CV	0.0669802	0.772987	1
SPARCL1_CM	0.0667119	0.773873	1
CNTN1_CV	0.0665591	0.774378	1
ICAM-2_CV	-0.0664014	0.774899	1
AZU1_CV	0.0610957	0.792491	1
MBL2_CM	-0.0548785	0.813229	1
MFAP5_CM	0.0543885	0.814868	1
SELE_CV	-0.0505306	0.827803	1
CA4_CM	0.0468642	0.840137	1
PTPRS_CM	0.0464579	0.841506	1
FABP4_CV	-0.0456766	0.84414	1
IGFBP-1_CV	-0.0429423	0.853369	1
IGLC2_CM	0.0365805	0.874914	1
TNFRSF14_CV	-0.0336065	0.885015	1
AOC3_CM	-0.0329695	0.887181	1
REG1A_CM	0.0310053	0.893865	1
PSP-D_CV	-0.0300171	0.89723	1
TFPI_CV	-0.0292484	0.899849	1
FAS_CV	-0.0291316	0.900247	1
SERPINA5_CM	0.0277651	0.904905	1
ST6GAL1_CM	-0.0276449	0.905315	1
TGFBI_CM	-0.026354	0.909719	1
CCL14_CM	-0.0245859	0.915754	1
CES1_CM	-0.0233799	0.919874	1
TNXB_CM	-0.0229402	0.921376	1
IGFBP6_CM	0.0204488	0.929893	1
DPP4_CM	0.019368	0.933591	1
MET_CM	-0.0105488	0.963803	1
AXL_CV	0.00906398	0.968896	1
EGFR_CV	-0.00635496	0.978189	1
NOTCH1_CM	0.00601209	0.979366	1
DEFA1_CM	-0.00535971	0.981605	1
FCN2_CM	-0.00363275	0.987531	1
CDH5_CV	0.00265726	0.990879	1
OSMR_CM	-0.000795562	0.997269	1

## Sheet: PANSS general psychopathy
Protein names	Pearson's correlation coefficients	p values	Benjamini–Hochberg corrected p values		The suffix in protein names indicates the protein levels were measured using each Olink® Target panel (_CM: Olink® Target 96 Cardiometabolic, _CV: Olink® Target 96 Cardiovascular III, _In: Olink® Target 96 Inflammation, _Nl: Olink® Target 96 Neuro Exploratory, _NE: Olink® Target 96 Neurology and _Cy: Olink® Target 48 Cytokine).
Ep-CAM_CV	0.557491	0.0086471	0.788718
Notch 3_CV	0.521637	0.0152973	0.935684
PAM_CM	0.500939	0.0207135	0.975395
VCAM1_CM	0.492416	0.0233473	0.984359
IL2-RA_CV	0.470602	0.0313143	0.996181
TNFSF13B_CV	0.417107	0.0599489	0.999979
TNC_CM	0.389251	0.0811428	1
SELL_CM	0.37337	0.0954852	1
GDF-15_CV	0.371764	0.0970328	1
IL-18BP_CV	0.3609	0.10799	1
IGLC2_CM	0.360533	0.108375	1
vWF_CV	0.359955	0.108984	1
ICAM3_CM	0.354346	0.11502	1
LILRB5_CM	0.34872	0.121314	1
CTSD_CV	0.348333	0.121755	1
TIMD4_CM	0.34665	0.123691	1
OPG_CV	0.342704	0.128313	1
SHPS-1_CV	0.328419	0.146078	1
CCL14_CM	0.319478	0.158038	1
GAS6_CM	0.318344	0.159603	1
CHI3L1_CV	0.308239	0.174016	1
AP-N_CV	-0.308031	0.174323	1
MCP-1_CV	0.307666	0.174859	1
IGFBP6_CM	-0.306512	0.176567	1
TLT-2_CV	0.303527	0.181035	1
Gal-4_CV	0.289972	0.202288	1
FCGR3B_CM	0.284735	0.21093	1
QPCT_CM	0.284716	0.210962	1
ANGPTL3_CM	0.274681	0.228197	1
C2_CM	-0.264489	0.246619	1
PAI_CV	0.264486	0.246624	1
CA1_CM	-0.259312	0.256332	1
VASN_CM	-0.257574	0.259647	1
PGLYRP1_CV	-0.253507	0.26751	1
TR_CV	0.251958	0.270544	1
AOC3_CM	-0.251562	0.271323	1
ICAM-2_CV	0.25101	0.272411	1
CPB1_CV	0.249951	0.274507	1
IGFBP-2_CV	0.245418	0.283591	1
IGFBP3_CM	0.244028	0.286413	1
PCOLCE_CM	0.240576	0.293497	1
GRN_CV	0.238193	0.298451	1
MMP-3_CV	-0.236028	0.302996	1
DPP4_CM	-0.232498	0.310495	1
CCL18_CM	-0.22338	0.33038	1
COL1A1_CV	0.220134	0.337638	1
ITGB2_CV	0.217683	0.343179	1
PON3_CV	0.216945	0.34486	1
CD163_CV	0.216086	0.34682	1
ST2_CV	-0.21353	0.352692	1
OPN_CV	0.21295	0.354033	1
CHIT1_CV	-0.211458	0.357495	1
PLC_CV	0.209781	0.361408	1
PRTN3_CV	0.209717	0.361558	1
PRSS2_CM	0.209655	0.361703	1
MMP-2_CV	0.208591	0.364201	1
TR-AP_CV	-0.204184	0.374649	1
AXL_CV	0.203016	0.377446	1
REG1A_CM	0.202901	0.377723	1
CST3_CM	0.198976	0.387214	1
IL-6RA_CV	0.195874	0.394807	1
IGFBP-7_CV	0.195731	0.39516	1
FCN2_CM	0.19553	0.395656	1
LYVE1_CM	0.194351	0.398566	1
CD93_CV	0.191553	0.405522	1
TNF-R2_CV	0.189977	0.40947	1
ICAM1_CM	-0.189378	0.410975	1
CPA1_CV	0.189182	0.41147	1
EGFR_CV	0.188864	0.412271	1
UMOD_CM	-0.188565	0.413024	1
PCSK9_CV	0.186597	0.418006	1
KLK6_CV	-0.176742	0.443436	1
FAS_CV	0.173746	0.451325	1
MB_CV	0.171655	0.456874	1
AZU1_CV	-0.167079	0.469138	1
TCN2_CM	-0.166179	0.47157	1
PI3_CV	0.164563	0.475953	1
CTSZ_CV	0.164374	0.476466	1
NRP1_CM	-0.162485	0.481616	1
PDGF subunit A_CV	0.162332	0.482037	1
F11_CM	-0.1592	0.490641	1
t-PA_CV	-0.156832	0.497197	1
RETN_CV	0.155887	0.499826	1
CNDP1_CM	0.155541	0.50079	1
TNFRSF10C_CV	-0.154753	0.502988	1
SELE_CV	0.154519	0.503641	1
CSTB_CV	-0.152654	0.508869	1
PSP-D_CV	0.151684	0.511595	1
IGFBP-1_CV	0.145916	0.527963	1
MET_CM	-0.144162	0.532989	1
LDL receptor_CV	0.140648	0.543122	1
FAP_CM	-0.139932	0.545199	1
MMP-9_CV	-0.135865	0.557055	1
ALCAM_CV	0.134323	0.561581	1
CA3_CM	0.134057	0.562363	1
CCL24_CV	0.132116	0.568088	1
TNFRSF14_CV	0.130969	0.571482	1
CRTAC1_CM	0.125329	0.588297	1
uPA_CV	0.123853	0.592735	1
TNF-R1_CV	0.122783	0.595959	1
GP1BA_CM	0.119674	0.605366	1
CD46_CM	0.116202	0.615946	1
MEGF9_CM	-0.112337	0.627813	1
THBS4_CM	0.111381	0.63076	1
CNTN1_CV	0.111235	0.631211	1
BLM hydrolase_CV	0.110187	0.634448	1
LILRB1_CM	0.109372	0.636974	1
FETUB_CM	0.104098	0.653395	1
SERPINA7_CM	-0.102241	0.659215	1
JAM-A_CV	0.100915	0.663383	1
PLTP_CM	0.10086	0.663555	1
CD59_CM	0.0975005	0.674158	1
CASP-3_CV	0.0973079	0.674768	1
TNXB_CM	0.0967552	0.676518	1
ST6GAL1_CM	0.0960009	0.67891	1
DEFA1_CM	0.0957661	0.679655	1
CDH1_CM	0.0956131	0.680141	1
SCGB3A2_CV	-0.0952647	0.681247	1
LTBR_CV	0.0936357	0.686428	1
OSMR_CM	0.0915819	0.69298	1
SELP_CV	0.0901862	0.697445	1
IL-1RT1_CV	0.0901577	0.697536	1
TFF3_CV	0.0895841	0.699374	1
FCGR2A_CM	0.0883805	0.703235	1
IL7R_CM	-0.0872506	0.706866	1
EFEMP1_CM	0.0871114	0.707314	1
SPARCL1_CM	-0.0849249	0.71436	1
ANG_CM	0.0817722	0.724559	1
APOM_CM	-0.0803812	0.729073	1
EPHB4_CV	0.0770108	0.740047	1
SERPINA5_CM	-0.0758484	0.743843	1
IL-17RA_CV	0.0744863	0.748298	1
CFHR5_CM	-0.0701202	0.762632	1
PLA2G7_CM	0.0697789	0.763755	1
TIMP1_CM	0.0682585	0.768766	1
CCL5_CM	0.0666893	0.773948	1
SAA4_CM	-0.0631959	0.785515	1
GP6_CV	0.0598307	0.7967	1
TIMP4_CV	0.0595967	0.797479	1
GNLY_CM	-0.0588542	0.799953	1
U-PAR_CV	0.0583471	0.801643	1
CDH5_CV	0.0576287	0.804039	1
TIE1_CM	0.0564856	0.807856	1
SPON1_CV	0.0537682	0.816945	1
MBL2_CM	0.0526567	0.820669	1
PROC_CM	0.0521632	0.822324	1
REG3A_CM	-0.0512361	0.825435	1
C1QTNF1_CM	-0.0507899	0.826933	1
F7_CM	-0.0495642	0.83105	1
LILRB2_CM	-0.0484308	0.834862	1
DLK-1_CV	0.0475132	0.837951	1
NOTCH1_CM	-0.0468984	0.840022	1
CCL15_CV	0.0460928	0.842736	1
NT-proBNP_CV	0.0456007	0.844395	1
CR2_CM	-0.0443505	0.848614	1
RARRES2_CV	0.0439563	0.849944	1
MFAP5_CM	-0.0430555	0.852987	1
NID1_CM	0.0428942	0.853532	1
CES1_CM	0.0414658	0.858361	1
COL18A1_CM	0.0411779	0.859335	1
MPO_CV	0.0396573	0.864482	1
TGFBI_CM	0.0394709	0.865114	1
IL-1RT2_CV	0.0347568	0.881106	1
SOD1_CM	-0.0315179	0.89212	1
COMP_CM	-0.0263525	0.909724	1
PRCP_CM	-0.0248759	0.914764	1
CXCL16_CV	-0.0238458	0.918282	1
FABP4_CV	0.0184143	0.936854	1
KIT_CM	-0.0143814	0.950665	1
TFPI_CV	0.0135771	0.953421	1
ENG_CM	0.00946872	0.967507	1
LCN2_CM	0.00930428	0.968071	1
PLXNB2_CM	-0.00873463	0.970025	1
PTPRS_CM	0.00685691	0.976467	1
CHL1_CM	0.00535086	0.981635	1
NCAM1_CM	0.00439325	0.984921	1
TGFBR3_CM	0.00324864	0.98885	1
Gal-3_CV	-0.00281214	0.990348	1
CA4_CM	-0.000905725	0.996891	1
